# 1           **Thermogenic hydrocarbons fuel a redox stratified** 2           **subseafloor microbiome in deep sea cold seep sediments**

3           Xiyang Dong<sup>1, 2, \*</sup>, Jayne E. Rattray<sup>2</sup>, D. Calvin Campbell<sup>3</sup>, Jamie Webb<sup>4</sup>,  
4           Anirban Chakraborty<sup>2</sup>, Oyeboade Adebayo<sup>2</sup>, Stuart Matthews<sup>2</sup>, Carmen Li<sup>2</sup>,  
5           Martin Fowler<sup>4</sup>, Adam Macdonald<sup>5</sup>, Ryan A. Groves<sup>2</sup>, Ian A. Lewis<sup>2</sup>, Scott H. Wang<sup>2</sup>,  
6           Daisuke Mayumi<sup>6</sup>, Chris Greening<sup>7, 8</sup>, Casey R.J. Hubert<sup>2, \*</sup>

7           <sup>1</sup> School of Marine Sciences, Sun Yat-Sen University, Zhuhai, 519082, China

8           <sup>2</sup> Department of Biological Sciences, University of Calgary, Calgary, AB T2N 1N4,  
9           Canada

10          <sup>3</sup> Geological Survey of Canada-Atlantic, Dartmouth, NS B3B 1A6, Canada

11          <sup>4</sup> Applied Petroleum Technology (Canada), Calgary, AB T2N 1Z6, Canada

12          <sup>5</sup> Nova Scotia Department of Energy and Mines, Halifax, NS B2Y 4A2, Canada

13          <sup>6</sup> Institute for Geo-Resources and Environment, Geological Survey of Japan, National  
14          Institute of Advanced Industrial Science and Technology (AIST), 1-1-1 Higashi, Tsukuba,  
15          305-8567, Japan

16          <sup>7</sup> School of Biological Sciences, Monash University, Clayton, VIC 3800, Australia

17          <sup>8</sup> Department of Microbiology, Biomedicine Discovery Institute, Monash University,  
18          Clayton, VIC 3800, Australia

19

20          \* Corresponding authors.

21          Emails: dongxy23@mail.sysu.edu.cn (X.D.); chubert@ucalgary.ca (C.R.J.H.)

## 22 **Abstract**

23 At marine cold seeps, gaseous and liquid hydrocarbons migrate from deep subsurface  
24 origins to the sediment-water interface. Cold seep sediments are known to host  
25 taxonomically diverse microorganisms, but little is known about their metabolic potential  
26 and depth distribution in relation to hydrocarbon and electron acceptor availability. In  
27 this work, we combined geochemical, metagenomic and metabolomic measurements in  
28 distinct sediment redox regimes to profile microbial activities within the uppermost 350  
29 cm of a newly discovered cold seep in the NW Atlantic deep sea (2.3 km water depth).  
30 Depth-resolved metagenomic profiling revealed compositional and functional  
31 differentiation between near-surface sediments (dominated by Proteobacteria) and  
32 deeper subsurface layers (dominated by Atribacteria, Chloroflexi, Euryarchaeota and  
33 Lokiarchaeota). Metabolic capabilities of community members were inferred from 376  
34 metagenome-assembled genomes spanning 46 phyla (including five novel candidate  
35 phyla). In deeper sulfate-reducing and methanogenic sediments, various community  
36 members are capable of anaerobically oxidizing short-chain alkanes (alkyl-CoM  
37 reductase pathway), longer-chain alkanes (fumarate addition pathway), and aromatic  
38 hydrocarbons (fumarate addition and subsequent benzoyl-CoA pathways).  
39 Geochemical profiling demonstrated that hydrocarbon substrates are abundant in this  
40 location, thermogenic in origin, and subject to biodegradation. The detection of alkyl-  
41 /arylalkylsuccinate metabolites, together with carbon isotopic signatures of ethane,  
42 propane and carbon dioxide, support that microorganisms are actively degrading  
43 hydrocarbons in these sediments. Hydrocarbon oxidation pathways operate alongside  
44 other deep seabed metabolisms such as sulfide oxidation, hydrogen oxidation, carbon  
45 fixation, fermentation and reductive dehalogenation. Upward migrated thermogenic  
46 hydrocarbons thus sustain diverse microbial communities with activities that affect  
47 subseafloor biogeochemical processes across the redox spectrum in deep sea cold  
48 seeps.

## 49 Introduction

50 Marine cold seeps are characterised by the migration of gas and oil from deep  
51 subsurface sources to the sediment-water interface<sup>1, 2</sup>. This seepage often contains  
52 gaseous short-chain alkanes, as well as heavier liquid alkanes and aromatic  
53 compounds<sup>3</sup>, that originate from deep thermogenic petroleum deposits. Migrated  
54 hydrocarbons can serve as an abundant source of carbon and energy for  
55 microorganisms in these ecosystems, either via their direct utilization or indirectly  
56 through metabolizing by-products of hydrocarbon biodegradation<sup>4</sup>. Multiple 16S rRNA  
57 gene surveys have revealed that cold seep sediments at or near the sediment-water  
58 interface host an extensive diversity of archaeal and bacterial lineages<sup>5-9</sup>. However,  
59 much less is known about metabolic versatility of this diverse microbiome, and how  
60 surface and subsurface populations are connected and differentiated in different redox  
61 zones within the sediment column<sup>10, 11</sup>. Most seep-associated microorganisms lack  
62 sequenced genomes, precluding meaningful predictions of relationships between  
63 microbial lineages and their biogeochemical functions<sup>4, 8, 10-13</sup>.

64 Geochemical studies have provided evidence that microorganisms in deep seafloor  
65 sediments, including cold seeps, mediate anaerobic hydrocarbon oxidation<sup>2, 3</sup>. A range  
66 of efforts have been undertaken to enrich and isolate anaerobic hydrocarbon-oxidizing  
67 microorganisms from cold seep sediments and other ecosystems rich in hydrocarbons  
68 (e.g. marine hydrothermal vents)<sup>5-9, 14</sup>. Numerous studies have focused on anaerobic  
69 oxidation of methane, since methane generally is the dominant hydrocarbon in cold  
70 seep fluids. This process is mediated by anaerobic methanotrophic archaea (ANME)  
71 through the reverse methanogenesis pathway, typically in syntrophy with bacteria that  
72 can reduce electron acceptors such as sulfate, nitrate, and metal oxides<sup>8, 15, 16</sup>.  
73 Investigations of enrichment cultures have also revealed anaerobic bacterial or archaeal  
74 oxidation of non-methane alkanes and aromatic hydrocarbons, including ethane (e.g.  
75 *Ca. Argoarchaeum*)<sup>17</sup>, *n*-butane (e.g. *Ca. Syntrophoarchaeum* and *Desulfobacteraceae*  
76 BuS5)<sup>9, 18</sup>, dodecane (e.g. *Desulfosarcina/Desulfococcus* clade)<sup>6</sup>, and naphthalene (e.g.  
77 *deltaproteobacterial* strain NaphS2)<sup>19, 20</sup>. In parallel, culture-independent approaches

78 have provided a holistic *in situ* perspective on hydrocarbon biodegradation, with most  
79 studies focused on hydrothermally influenced sediments that are rich in hydrocarbons<sup>21-</sup>  
80 <sup>24</sup>. These studies have provided insights into the phylogenetic diversity and functional  
81 capabilities of potential hydrocarbon-degrading microorganisms, as well as their  
82 potential metabolic interactions with other community members. In addition to  
83 hydrocarbons, microbial life in deep-sea sediments is also supported by other various  
84 chemicals, including necromass-derived compounds and inorganic electron donors<sup>4, 25</sup>.

85 At present, in contrast to studies of deep-sea hydrothermal sediments<sup>21-23</sup>, there have  
86 been fewer reports on the metabolism of hydrocarbons and other compounds in cold  
87 seep sediments, especially in the deep sea<sup>4</sup>. Single-gene surveys, for example  
88 investigating the diversity of genes encoding enzymes for alkane or aromatic compound  
89 activation via addition to fumarate<sup>3, 11, 26</sup>, have increased our knowledge about the  
90 phylogenetic diversity of hydrocarbon degraders. However, more integrative  
91 approaches connecting geochemical processes to underlying microbial communities at  
92 cold seeps are lacking. In this study, we combine geochemical and metabolomic  
93 analyses with gene- and genome-centric metagenomics to understand the communities  
94 and processes responsible for anaerobic oxidation of different hydrocarbons, as well as  
95 other associated metabolisms, at a deep sea cold seep. The Scotian Basin is at the  
96 volcanic and non-volcanic transition continental margin, extending over an area of  
97 ~260,000 km<sup>2</sup> in the northwest Atlantic Ocean, offshore Nova Scotia in eastern Canada.  
98 Based on satellite and seismic reflection data, this area shows strong evidence for  
99 seepage of thermogenic hydrocarbons with occurrences of high-pressure diapirs,  
100 polygonal faults, pockmarks, and gas chimneys<sup>27</sup>. Through this work, we provide strong  
101 evidence supporting that (i) hydrocarbons are thermogenic and experience  
102 biodegradation upon migration up into surface sediment layers; (ii) these processes are  
103 actively performed in the cold deep sea by bacteria and archaea through diverse  
104 biochemical mechanisms; and (iii) biodegradation is central to ecosystem productivity  
105 and supports various ecological interactions within the microbial communities.

## 106 Results

### 107 Thermogenic hydrocarbons migrate up the seep and are subject to 108 biodegradation

109 At a water depth of 2306 m, a 3.44-meter-long piston core was retrieved from the  
110 Scotian slope, off the coast of Eastern Canada (**Supplementary Figure 1**)<sup>27</sup>. In the  
111 bottom of the core, at 332-344 cm below the seafloor (cmbfsf), gas hydrates were  
112 observed in frozen crystalized form and numerous gas bubbles escaped during retrieval.  
113 A strong sulfide odor was also detected during core retrieval and processing. Molecular  
114 and isotopic composition of two headspace gas samples subsampled from the  
115 sediments adjacent to the gas hydrates (332-337 and 337-344 cmbfsf) detected 7,446  
116 and 4,029 ppm of total hydrocarbon gases (THG), respectively, made up of primarily  
117 methane (85% and 79%) as well as considerable proportions of C<sub>2</sub>-C<sub>4</sub> gases (3.22%  
118 and 6.54%) (**Table 1**). In order to assess the origin of the hydrocarbon gases, their  
119 molecular and isotopic compositions were compared to recently revised genetic  
120 diagrams<sup>28</sup>, focusing on  $\delta^{13}\text{C-C}_1$ ,  $\text{C}_1/(\text{C}_2+\text{C}_3)$ ,  $\delta^2\text{H-C}_1$ ,  $\delta^{13}\text{C-C}_1$  and  $\delta^{13}\text{C-CO}_2$ . All  
121 measured geochemical parameters are within the range defined for gases of  
122 thermogenic origin indicating that they migrated upward from a mature petroleum  
123 source rock (**Table 1**). Ethane and propane were <sup>13</sup>C-enriched compared with methane,  
124 likely reflecting the addition of some biogenic methane to the migrating thermogenic gas,  
125 as well as biodegradation of ethane and propane<sup>28</sup>. Ratios of *iso*-butane to *n*-butane  
126 were 1.6 to 1.8 and suggest preferential consumption of more labile *n*-alkanes<sup>3</sup>.

127 Sediments from four additional depths were analyzed for extractable organic matter  
128 (EOM, i.e., C<sub>12+</sub> hydrocarbons), showing high yields (104-361 mg/kg rock) comprising  
129 saturated hydrocarbons (25-52%), aromatic hydrocarbons (10-14%), and other  
130 components (**Supplementary Table 1**). Further gas chromatographic analysis of these  
131 oil-laden sediments revealed large unresolved complex mixture (UCM) humps in the  
132 C<sub>13</sub>-C<sub>20</sub> *n*-alkane elution range (**Supplementary Figure 2**), indicative of oil  
133 biodegradation<sup>3</sup>. Pristane and phytane, widely used internal conserved markers for oil  
134 biodegradation<sup>29</sup>, were more abundant than C<sub>17</sub> and C<sub>18</sub> *n*-alkanes (**Supplementary**

135 **Figure 2)**, suggesting preferential biodegradation of *n*-alkanes. Consistent with this,  
136 carbon dioxide was isotopically heavy in these sediments (**Table 1**) and clearly  
137 associated with secondary microbial degradation<sup>28</sup>.

### 138 **Microbial communities are phylogenetically diverse and strongly stratified across** 139 **biogeochemical zones**

140 Deep shotgun metagenome sequencing was performed for sediments corresponding to  
141 four biogeochemical redox zones based on pore water sulfate concentrations and other  
142 geochemical data (**Table 2, Supplementary Figure 3 and Supplementary Note 1**).  
143 Alpha diversity (**Table 2**) was calculated using single-copy marker genes from the  
144 metagenomic datasets<sup>30</sup>, and cell density was estimated via quantitative PCR of  
145 bacterial and archaeal 16S rRNA genes (**Table 2**). Differences in diversity and cell  
146 density were related to the availability of migrated thermogenic hydrocarbons and  
147 sulfate (**Table 1, Supplementary Table 1 and Supplementary Figure 3**). Overall, the  
148 surface sediment (mixing zone) and underlying sediment (sulfate reduction zone)  
149 harboured the most diverse communities (Shannon index = 6.70 and 5.58) and highest  
150 bacterial cell density ( $2.64$  and  $2.22 \times 10^9$  16S rRNA genes  $g^{-1}$ ). In contrast, the  
151 sediment at 60 cmbsf (sulfate methane transition zone) harboured the most distinct  
152 communities (**Figure 1a**), the lowest microbial diversity (3.60), and the highest archaeal  
153 cell density ( $1.23 \times 10^9$  16S rRNA genes  $g^{-1}$ ). Deeper sediments (100 to 250 cmbsf;  
154 methanogenic zone) were more compositionally similar and harboured moderately to  
155 highly diverse and abundant communities (**Table 2 and Figure 1a**).

156 For taxonomic profiling, the phyloFlash pipeline<sup>31</sup> was applied to reconstruct 16S rRNA  
157 gene sequences from metagenome raw reads for each sediment depth (**Figure 1a**).  
158 Dominant bacterial lineages in surface sediments were *Gammaproteobacteria* (30%)  
159 and *Alphaproteobacteria* (19%), whereas Atribacteria (28-47%), Chloroflexi (6-37%),  
160 *Deltaproteobacteria* (6-16%), and Planctomycetes (1-15%) predominated at and below  
161 20 cmbsf (**Figure 1a**). As globally abundant groups in subseafloor sediments at ocean  
162 margins<sup>32, 33</sup>, Atribacteria and Chloroflexi accounted for most of the bacterial  
163 communities sampled. Deeper layers also contained candidate phyla largely absent



164 from shallower layers, e.g. TA06, Acetothermia, Zixibacteria, and Aerophobetes.  
165 Thaumarchaeota (mainly class *Nitrososphaeria*), the only dominant archaea found in  
166 surface sediment, were in low abundance in subsurface sediments (**Figure 1a**).  
167 *Methanomicrobia* (Euryarchaeota) and Lokiarchaeota (Asgard group) predominated at  
168 and below 20 cmbsf, with the former comprising 99% of archaea at 60 cmbsf, consistent  
169 with this being the sulfate methane transition zone (**Supplementary Figure 3**). *Ca.*  
170 *Bathyarchaeota*, *Ca.* Nanoarchaeota, *Thermoplasmata*, and *Ca.* Odinararchaeota were  
171 also abundant in certain layers. Taxonomic profiles produced by 16S rRNA gene  
172 amplicon sequencing were broadly similar to metagenomic profiling, but with differences  
173 in the relative abundances of specific groups (e.g. Chloroflexi and *Nitrososphaeria*)  
174 (**Figure 1a**). Together, both methods show that microbial communities throughout the  
175 sediment column are diverse and consist of mostly uncultured taxonomic groups.

176 Metagenomes were assembled for sediments from individual depths, and a co-  
177 assembly was performed by combining metagenomes from all depths<sup>34</sup>  
178 (**Supplementary Tables 2 and 3**). Binning of derived assemblies was based on  
179 tetranucleotide frequencies and coverage profiles using several algorithms<sup>35</sup>. This  
180 analysis yielded 376 unique metagenome-assembled genomes (MAGs; 293 bacterial  
181 and 83 archaeal) with >50% completeness and <10% contamination based on CheckM  
182 analysis<sup>36</sup>. Recovered MAGs spanned 43 different phyla, most of which are poorly  
183 characterized without cultured representatives (**Figure 1b, Supplementary Table 2**  
184 **and Supplementary Data 1**). Ten of these genomes could not be classified due to lack  
185 of reference genomes and, based on their phylogeny, may belong to five new candidate  
186 phyla (**Figure 1b and Supplementary Data 1**). Overall the 376 MAGs captured the  
187 prevalent bacterial and archaeal lineages revealed by 16S rRNA gene analysis (**Figure**  
188 **1a**). The MAGs with the highest relative abundance belong to the ANME-1 lineage, and  
189 together made up >40% of the microbial community based on read coverage in the  
190 sulfate methane transition zone at 60 cmbsf (**Supplementary Table 2**). Among ANME-  
191 1 genomes at this depth, the *in situ* replication rate inferred from iRep was relatively low  
192 (e.g. iRep score of 1.38 for S3\_bin12)<sup>37</sup>, suggesting slow replication despite high  
193 relative abundance (e.g. 4.69% for S3\_bin12) (**Supplementary Table 2**). MAGs

194 corresponding to Atribacteria, Lokiarchaeota, and Chloroflexi were also differentially  
195 enriched with depth, consistent with their dominance in these sediments and their  
196 occurrence in the deep marine biosphere more generally<sup>32,33</sup>. Among these groups, 22  
197 Chloroflexi MAGs were determined to have high genome replication rates, with a  
198 maximum iRep value of 4.0 for *Dehalococcoidia* S5\_bin22 in the methanogenic zone.  
199 This suggests several replication forks at the time of sampling, providing strong  
200 evidence for activity by *Dehalococcoidia*. Most other MAGs were much less abundant  
201 (e.g. <0.1%). Some nevertheless had large iRep values, for example *Ca. Thorarchaeota*  
202 S7\_bin1 from the Asgard group (iRep = 2.1) and *Desulfobacterales* S3\_bin8 (iRep =  
203 6.1), with relative abundances of 0.1% at 200 cmbsf and 0.28% at 150 cmbsf,  
204 respectively (**Supplementary Table 2**).

## 205 **Diverse Euryarchaeota potentially mediate anaerobic oxidation of methane and** 206 **other short chain alkanes**

207 Archaea activate short-chain alkanes (methane, ethane, propane, and butane) for  
208 anaerobic degradation using methyl/alkyl-coenzyme M reductases<sup>17</sup>. Sequences  
209 encoding the catalytic subunit of this enzyme (*mcrA*) were detected in metagenomes at  
210 all sediment depths except 0 cmbsf, with the highest abundance found at the sulfate  
211 methane transition zone (**Figure 2a**). A total of 20 MAGs within Euryarchaeota harbored  
212 *mcrA* sequences (**Figure 2b and Supplementary Table 4**). Genome trees showed  
213 these microorganisms belonged to representatives of three families of hydrogenotrophic  
214 methanogens (*Methanomicrobiaceae*, *Methanosarcinaceae* and *Methanosaetaceae*)<sup>38</sup>,  
215 two clusters of anaerobic methanotrophs (ANME-1 and ANME-2)<sup>39</sup>, and two lineages  
216 that have been shown to catalyse non-methane alkane oxidation (the GOM-Arc1  
217 lineage, and a novel sister lineage to *Ca. Syntrophoarchaeum*)<sup>17, 22</sup> (**Figure 3a**). In  
218 agreement with this, phylogenetic analysis of *mcrA* sequences from these MAGs  
219 resolved three major groups (**Figure 3b**): the canonical group clustering with  
220 methanogens and methanotrophs (ANME-1 and ANME-2) and two divergent groups  
221 clustering with *Ca. Syntrophoarchaeum*<sup>18</sup> and GOM-Arc1 (e.g. *Ca. Argoarchaeum*)<sup>17</sup>.  
222 These phylogenetic relationships, together with presence of the mixture of alkane gases  
223 and their carbon isotope ratios (**Table 1**) suggest that anaerobic methane- and



224 multi-carbon alkane-metabolizing archaea coexist in these cold seep sediments. These  
225 findings mirror those recently reported in the hot Guaymas Basin hydrothermal  
226 sediments<sup>40</sup> and thus reveal that recently discovered C<sub>2+</sub> short chain alkane  
227 metabolisms are not peculiar to hot hydrothermal settings and are likely much more  
228 widespread throughout the deep seabed at cold seeps. A notable difference from other  
229 cold seep sediments is that this Scotian Basin site is dominated by ANME-1 rather than  
230 ANME-2 lineages<sup>10, 11</sup>, with three distinct ANME-1 groups (S3\_bin4, Co\_bin174 and  
231 S3\_bin12) being particularly abundant (27.47%, 7.33% and 4.69%, respectively) at the  
232 sulfate methane transition zone (**Supplementary Table 2**), an observation supported  
233 by 16S rRNA gene amplicon sequencing (**Supplementary Table 5**).

234 To gain more detailed insights into anaerobic short chain alkane degradation in this  
235 non-hydrothermal setting, metabolic pathways involved in the oxidation of methane and  
236 non-methane gaseous alkanes were reconstructed<sup>17</sup> (**Figure 4**). Twelve MAGs harbour  
237 canonical *mcrA* genes that cluster with ANME-1 and ANME-2 methanotrophs, along  
238 with with *fwd*, *fr*, *mch*, *mtd*, *mer/metF/fae-hps* and *mtr* that mediate subsequent steps in  
239 the tetrahydromethanopterin-dependent ‘reverse methanogenesis’ pathway<sup>10, 41</sup> for  
240 oxidation of methyl-CoM to CO<sub>2</sub> (**Figure 4a and Supplementary Table 6**). Some MAGs  
241 lack specific genes in this pathway, likely reflecting variability in genome completeness  
242 (61% to 96%). Based on genome and gene trees, S6\_bin38 is closely related to  
243 putative ethane oxidizers within the GoM-Arc1 group<sup>21, 22, 38</sup>, including the verified  
244 anaerobic ethane oxidizer *Ca. Argoarchaeum ethanivorans* Eth-Arch1<sup>17</sup> (**Figure 3**). Like  
245 other GoM-Arc1 genomes, S6\_bin38 encodes methyltransferases that potentially  
246 transfer the thioether (ethyl-CoM) derived from ethane activation to a thioester (acetyl-  
247 CoA), as well as enzymes to mediate acetyl-CoA cleavage (acetyl-CoA  
248 decarbonylase/synthase, ACDS) and stepwise dehydrogenation of the derived C<sub>1</sub> units  
249 (oxidative Wood-Ljungdahl pathway) (**Figure 4b and Supplementary Table 6**).  
250 S6\_bin38, like other members of the GoM-Arc1 group, lacks the  $\beta$ -oxidation pathway  
251 which is unnecessary for anaerobic ethane oxidation<sup>17</sup>. Taken together, these  
252 reconstructions suggest that S6\_bin38 represents an organism capable of oxidizing  
253 ethane in cold deep sea sediment.

254 *Methanosarcinales* Co\_bin109 likely has potential to oxidize butane and fatty acids that  
255 were present in the sediments (**Table 1 and Figure 5**). This genome contains two *mcrA*  
256 genes that cluster with high bootstrap support to the divergent alkyl-CoM reductases  
257 from *Ca. Syntrophoarchaeum* (**Figure 3b**) that is capable of anaerobic degradation of  
258 butane and possibly propane<sup>18</sup>. Also encoded in the genome are heterodisulfide  
259 reductase subunits (*hdrABC*) to reoxidize cofactors<sup>23</sup>, methyltransferases that  
260 potentially convert butyl-thioether to the butyryl-thioester, and the  $\beta$ -oxidation pathway  
261 to enable complete oxidation of the butyryl-thioester (**Figure 4c and Supplementary**  
262 **Table 6**). The presence of short chain acyl-CoA dehydrogenase (*acd*), butyryl-CoA  
263 dehydrogenase (*bcd*), and long-chain acyl-CoA synthetase (*fadD*) may allow  
264 *Methanosarcinales* Co\_bin109 to oxidize long chain fatty acids; this is similar to the  
265 basal *Archaeoglobi* lineage *Ca. Polytropus marinifundus*, which encodes two divergent  
266 McrA related to those found in *Ca. Bathyarchaeota* and *Ca. Syntrophoarchaeum*<sup>42</sup>.  
267 Consistent with this, Co\_bin109 encodes a Wood-Ljungdahl pathway (including carbon  
268 monoxide dehydrogenase / acetyl-CoA synthase complex) for complete fatty acid  
269 oxidation (**Supplementary Table 6**).

## 270 **Members of Chloroflexi and Deltaproteobacteria potentially degrade liquid** 271 **alkanes and aromatic hydrocarbons**

272 Other community members are predicted to degrade aromatic hydrocarbons and *n*-  
273 alkanes detected in the sediments (**Table 1 and Supplementary Table 1**) via  
274 hydrocarbon addition to fumarate<sup>43</sup>. Nine MAGs assigned to *Dehalococcoidia*,  
275 *Desulfobacterales* and *Syntrophobacterales* encode alkylsuccinate synthase (*assA*)  
276 known to mediate *n*-alkane activation (**Figure 6a; Supplementary Tables 2 and 7**).  
277 Phylogenetic analysis confirms that these *assA* genes cluster closely with those of  
278 experimentally validated alkane oxidizers *Desulfatibacillum aliphaticivorans* DSM 15576  
279 and *Desulfosarcina* sp. BuS5 within Deltaproteobacteria<sup>8, 44</sup> (**Supplementary Figure 4**).  
280 In most of these MAGs, more than one *assA* sequence variant was identified,  
281 suggesting some bacteria may activate multiple substrates by this mechanism<sup>45, 46</sup>. In  
282 addition to *assA* sequences, *Dehalococcoidia* Co\_bin57 and Co\_bin289 also encode  
283 related glycy radical enzymes clustering with benzylsuccinate synthases (*bssA*) and

284 naphthylmethylsuccinate synthases (*nmsA*) (**Supplementary Figure 4 and**  
285 **Supplementary Table 7**), known to mediate the anaerobic degradation of toluene or  
286 similar aromatic compounds. Metabolomic analysis detected four succinic acid  
287 conjugates involved in hydrocarbon activation, including conjugates of both toluene and  
288 propane (**Figures 5 and 6**). Most of the MAGs encoding *assA* or *bssA* genes (except  
289 *Dehalococcoidia* Co\_bin57) also encode the required genes to further process the alkyl-  
290 /arylalkylsuccinate compounds, convert them to acetyl-CoA through the  $\beta$ -oxidation  
291 pathway, and regenerate fumarate through the methylmalonyl-CoA pathway (**Figure 6a**  
292 **and 6c; Supplementary Table 7**). Accordingly, succinate and fumarate were also  
293 detected in the sediments (**Figure 5**).

294 Anaerobic hydrocarbon degradation depends on subsequent oxidation of acetyl-CoA.  
295 This can be achieved through a single-cell process (e.g. coupled to sulfate respiration)  
296 or via syntrophic interaction with another cell (e.g. with methanogens)<sup>8, 44</sup>. Like the  
297 related deltaproteobacterial isolate NaphS2, *Desulfobacterales* MAGs S4\_bin49 and  
298 S6\_bin7 contain genes for both the Wood-Ljungdahl pathway and dissimilatory sulfate  
299 reduction, suggesting the same organism can couple alkane mineralisation directly to  
300 sulfate reduction (**Supplementary Table 7**). By contrast, other MAGs containing genes  
301 for hydrocarbon addition to fumarate, including *Dehalococcoidia* and  
302 *Syntrophobacterales*, apparently lack terminal reductases or complete tricarboxylic acid  
303 cycles (**Supplementary Table 7**). These organisms may be obligate fermenters  
304 dependent on syntrophy with respect to the oxidation of *n*-alkanes, as further evidenced  
305 by identification of genes for mixed-acid fermentation and hydrogen production in these  
306 genomes (**Supplementary Tables 4 and 7**) and as seen in closely related organisms  
307 from both lineages<sup>45</sup>. Several MAGs found at the same depths were identified as  
308 methanogens (**Figure 3b and Supplementary Table 4**), thus syntrophic alkane  
309 mineralization via hydrogenotrophic or acetoclastic methanogenesis is another route for  
310 hydrocarbon biodegradation in this environment. Accordingly, potential alkane  
311 degraders like *Syntrophobacterales* S8\_bin7 were mainly found in the deeper  
312 methanogenic zone, co-occurring with methanogens such as *Methanomicrobiaceae*  
313 S8\_bin22 (**Figure 3b and Supplementary Table 2**).

314 Detection of *bssA* and *nmsA* suggest these cold seep microbial communities are also  
315 capable of utilizing aromatic hydrocarbons that were detected in the GC-MS analysis  
316 **(Figure 2a; Supplementary Table 1 and Supplementary Figure 4)**. Metabolites  
317 produced after initial activation normally channel into the central benzoyl-CoA  
318 degradation pathway **(Figure 6b)**. Benzoyl-CoA, as a universal biomarker for anaerobic  
319 degradation of aromatic compounds<sup>47</sup>, is reduced by benzoyl-CoA reductases of the  
320 ATP-dependent class I pathway (*bcr* genes; e.g., in *Thauera aromatica*) or ATP-  
321 independent class II pathway (*bam* genes; e.g., in sulfate reducers). These genes were  
322 detected in 13 bacterial MAGs, including *Dehalococcoidia*, *Anaerolineae*,  
323 *Deltaproteobacteria*, Planctomycetes, *Gammaproteobacteria*, and candidate phylum  
324 AABM5-125-24. Genes for further processing these compounds to 3-hydroxypimelyl-  
325 CoA (i.e. *oah*, *dch* and *had*) and acetyl-CoA ( $\beta$ -oxidation pathway) were also detected  
326 **(Figure 6c and Supplementary Table 8)**. Various compounds related to benzoyl-CoA  
327 degradation pathway were also detected, including benzoate and glutarate **(Figure 5)**.

## 328 **Metabolomic profiling suggests the community is supported by diverse energy** 329 **conservation and carbon acquisition strategies**

330 To understand the wider metabolic capabilities of these cold seep microbial  
331 communities, metabolomic analysis **(Figure 5)** was combined with gene-centric analysis  
332 of quality-filtered reads **(Figure 2a)** and unbinned metagenome assemblies  
333 **(Supplementary Note 2 and Supplementary Figure 5)**, as well as genome-centric  
334 analysis of the 376 MAGs **(Figure 2b)**. With respect to organotrophy, genes for the  
335 degradation of complex carbohydrates and peptides were prevalent. In total, ~7454  
336 potential carbohydrate-active enzymes (CAZymes) were detected, most notably  
337 glycoside hydrolases, carbohydrate esterases, and polysaccharide lyases<sup>48</sup>; CAZymes  
338 were numerous in bacterial lineages such as Planctomycetes, Bacteroidetes, and  
339 Armatimonadetes **(Supplementary Table 9)**. Annotated peptidases were more evenly  
340 distributed across bacteria and archaea, with the highest proportions found in genomes  
341 assigned to Patescibacteria, *Dehalococcoidia*, Aerophobetes, and Atribacteria **(Figure**  
342 **2b and Supplementary Table 10)**. Consistent with these genomic observations,  
343 metabolites associated with carbohydrate and peptide hydrolysis were detected (e.g.

344 glucose and sucrose) (**Figure 5**). Many community members also possess gene sets to  
345 convert hydrolysis products to pyruvate through the Embden-Meyerhof-Parnas (185  
346 MAGs) and Entner-Doudoroff (51 MAGs) pathways (**Figure 2b and Supplementary**  
347 **Table 4**). Accordingly, both glucose 6-phosphate and pyruvate were detected in the  
348 sediment column metabolomes (**Figure 5**). Most genomes also encoded the potential to  
349 ferment pyruvate to formate (119 MAGs), acetate (270 MAGs), lactate (14 MAGs), and  
350 ethanol (94 MAGs), as well as the potential for hydrogen production via abundant  
351 [FeFe]-hydrogenases associated with fermentation or group 3 [NiFe]-hydrogenases<sup>49</sup>  
352 (**Figure 2a and 2b; Supplementary Figure 6 and Supplementary Table 4**). The  
353 ability to degrade fatty acids and other organic acids via beta-oxidation was common to  
354 Lokiarchaeota, Chloroflexi, and Proteobacteria (**Supplementary Table 11**), with  
355 associated metabolites also detected (e.g. 6-carboxyhexanoate, 10-hydroxydecanoate,  
356 and other carboxylic acids) (**Figure 5**).

357 The most prevalent carbon fixation pathways in these sediments are the Calvin-Benson  
358 cycle (68 MAGs), Wood-Ljungdahl pathway (114 MAGs), and 4-hydroxybutyrate cycle  
359 (4 MAGs) (**Figure 2b and Supplementary Table 4**), consistent with the abundance of  
360 corresponding key metabolic genes (**Figure 2a**). The sediment microbial communities  
361 include various putative sulfide, thiosulfate, ammonia, nitrite, carbon monoxide, and  
362 hydrogen oxidizers (**Figure 2b and Supplementary Table 4**), with provision of these  
363 compounds potentially via biological or geological processes. Canonical genes for  
364 sulfide oxidation (sulfide:quinone oxidoreductase and flavocytochrome *c* sulfide  
365 dehydrogenase) were found in 38 MAGs from diverse lineages (e.g. Proteobacteria,  
366 *Anaerolineales*, and Heimdallarchaeota) (**Supplementary Figures 7-8**). The oxidative  
367 bacterial-type DsrAB-type dissimilatory sulfite reductases<sup>50</sup> were detected in four  
368 genomes from *Alpha*- and *Gammaproteobacteria* potentially responsible for sulfide  
369 oxidation (**Supplementary Figure 9**). Five MAGs from *Epsilon*- and  
370 *Gammaproteobacteria* encoded genes for the SoxB component of the periplasmic  
371 thiosulfate-oxidizing Sox enzyme complex (**Supplementary Figure 10**). Genes for  
372 ammonia oxidation to hydroxylamine (ammonia monooxygenase) were detected in four  
373 Thaumarchaeota genomes (**Supplementary Figure 11**), while those associated with



374 further oxidation of nitrite (nitrite oxidoreductase) were tentatively found in five MAGs  
375 affiliated to *Anaerolineales*, Acidobacteria, Actinobacteria, and Planctomycetes  
376 **(Supplementary Figure 12)**. Gene abundance profiles suggest that these nitrogen  
377 metabolisms mainly occur in 0-20 cmbsf surface sediments **(Figure 2a)**. Three MAGs  
378 belonging to Actinobacteria, Actinobacteria, and *Alphaproteobacteria* encoded carbon  
379 monoxide dehydrogenase large subunit (CoxL), a marker for carbon monoxide oxidation  
380 **(Supplementary Figure 13)**. Ten phyla (58 MAGs) encoded group 1 and group 2  
381 [NiFe]-hydrogenases associated with hydrogenotrophic respiration, with certain lineages,  
382 including *Deltaproteobacteria*, Planctomycetes, *Dehalococcoidia*, Actinobacteria, and  
383 Aerophobetes, encoding subgroups (1a, 1b) that support hydrogenotrophic sulfate  
384 reduction and halorespiration<sup>51, 52</sup> **(Figure 2b and Supplementary Figure 14;**  
385 **Supplementary Tables 4 and 12)**. Additionally, 197 MAGs from 35 phyla encode  
386 cofactor-coupled group 3 [NiFe]-hydrogenases **(Supplementary Figure 6)** and energy-  
387 converting group 4 [NiFe]-hydrogenases **(Supplementary Figure 15)**, both are which  
388 are known to be physiologically reversible<sup>49</sup>.

389 Metabolomics revealed organohalides as potential respiratory electron acceptors in the  
390 sediments, e.g. dichlorotoluene and dichlorodiphenyldichloroethane **(Figure 5)**.  
391 Accordingly, reductive dehalogenases were encoded in 54 MAGs from 13 phyla,  
392 including lineages such as Chloroflexi, Lokiarchaeota, Bathyarchaeota, and  
393 Proteobacteria **(Figure 2, Supplementary Figure 16 and Supplementary Table 12)**.  
394 Organisms encoding these enzymes may conserve energy by coupling oxidation of H<sub>2</sub>  
395 and other electron donors to the reduction of organochloride compounds like the ones  
396 detected in the sediments **(Figure 5)**. Full gene sets for dissimilatory reduction of sulfate  
397 to sulfide (*sat*, *aprAB* and *dsrAB*) were found in 12 genomes from *Deltaproteobacteria*  
398 and Zixibacteria **(Figure 2b, Supplementary Figure 9 and Supplementary Table 4)**.  
399 Thirty bacterial members of these sediment communities are predicted to use nitrate or  
400 nitrite as electron acceptors, though none encoded all of the genes necessary for  
401 complete denitrification or dissimilatory nitrate reduction to ammonia **(Supplementary**  
402 **Table 4)**. Terminal oxidases were also detected, but in line with oxygen only permeating  
403 the upper centimeters of marine sediments, these genes were mainly found in lineages



404 such as Proteobacteria and Thaumarchaeota that dominated the upper sediment layers  
405 **(Figure 2a and 2b; Supplementary Table 4).**

## 406 Discussion

407 This work provides evidence that thermogenic short-chain alkane gases, larger alkanes,  
408 and aromatic compounds are biodegraded in Scotian Basin cold seep sediments in the  
409 NW Atlantic deep sea. Sequencing DNA extracted from different sediment depths  
410 obtained via piston coring in >2 km deep water enabled associating petroleum  
411 geochemistry with microbial populations and metabolites. We also demonstrate that  
412 archaea capable of oxidizing methane and short-chain hydrocarbons co-exist with  
413 bacteria capable of degrading larger aliphatic and aromatic compounds. These findings  
414 reveal that anaerobic hydrocarbon-degrading microorganisms are more phylogenetically  
415 and metabolically diverse, and geographically widespread, than previously known<sup>5, 8, 17,</sup>  
416 <sup>53</sup>.

417 The capacity for anaerobic degradation of hydrocarbons was detected in 44 out of 367  
418 MAGs, including members encoding genes for C<sub>2+</sub> hydrocarbon oxidation that belong to  
419 the phyla Euryarchaeota and Chloroflexi, in addition to well-known deltaproteobacterial  
420 lineages<sup>21, 22</sup>. Distributions of these organisms span from the near-surface sediment  
421 horizon to the deeper zones where sulfate is depleted, with overall relative abundance  
422 ranging from 1% to 42% at different depths. Identification of succinate derivatives<sup>54</sup> (e.g.  
423 2-isopropylsuccinate and benzylsuccinate) in pore water and determination of carbon  
424 stable isotopic signatures for hydrocarbon gases (e.g. ethane and propane) and carbon  
425 dioxide<sup>28</sup> provide direct evidence of biodegradation actively occurring in these deep sea  
426 sediments. Phylogenetic analysis and pathway reconstruction shed new light on the  
427 different enzymes responsible for methane, ethane, and butane oxidation, relative to  
428 previous studies of anaerobic hydrocarbon degradation in cold seep sediments<sup>5, 8, 17, 53</sup>.  
429 Notably, the recently described process of multi-carbon alkane oxidation by archaea co-  
430 occurs with anaerobic methane oxidation by ANME archaea. Previous observations of  
431 these phenomena have mainly featured hydrothermal vent environments<sup>15, 22, 38</sup>  
432 whereas this deep sea setting experiences permanently low temperatures. Methane

433 oxidizers are most abundant, in agreement with the high concentration of methane;  
434 however, by investigating an environment that also has relatively high concentrations of  
435 C<sub>2+</sub> gases, the potential and importance of both GoM-Arc1- and *Syntrophoarchaeum*-  
436 like archaea degrading thermogenic hydrocarbons in cold seep sediments is shown for  
437 the first time. This points to a more widespread significance for these microbial groups  
438 in marine carbon cycling, in different environments and at different temperatures.

439 For anaerobic hydrocarbon oxidation to be energetically favorable, it must be coupled to  
440 the reduction of an electron acceptor either directly or through electron transfer to a  
441 syntrophic partner. None of the canonical terminal reductases (e.g. for iron, sulfate,  
442 nitrate, nitrite reduction) reported in other studies<sup>23</sup> were detected in MAGs representing  
443 alkane-oxidizing archaea. This suggests a syntrophic partner organism is necessary to  
444 enable growth on short-chain hydrocarbons. Various sulfate reducers were detected in  
445 the same depths as the ANME archaea, and are likely syntrophic partners, including  
446 members of the well-known SEEP-SRB1 lineage<sup>12</sup> (this group was prevalent in both  
447 metagenomes and amplicon libraries). ANME-1 MAGs were 60 to 91% complete, so it  
448 cannot be ruled out that they harbour canonical or alternative reductases e.g. as in the  
449 recently proposed bacterium-independent anaerobic methane oxidation<sup>10</sup> whereby  
450 reverse methanogenesis is coupled to reduction of elemental sulfur and polysulfide.  
451 Consistent with this model, genes encoding sulfide:quinone oxidoreductase-like proteins  
452 in ANME-1 MAGs S3\_bin4 and Co\_bin174 were detected in deeper layers of the  
453 sediment where sulfate was depleted (e.g. relative abundances of 0.1 to 1.4% at 100  
454 and 150 cmbsf). Similarly, most potential alkane-degrading bacterial MAGs lack genes  
455 for respiration. Members of the *Syntrophobacterales*, such as *Smithella* and *Syntrophus*,  
456 have been shown to be able to degrade alkanes by addition to fumarate under  
457 methanogenic conditions in syntrophic association with methanogens<sup>8, 55</sup>. It is therefore  
458 likely that both archaea and bacteria rely on syntrophic partners to complete anaerobic  
459 hydrocarbon degradation, not only in terms of metabolite trade-offs, but also for  
460 accepting electrons<sup>56, 57</sup>.

461 Besides hydrocarbons supplied from deep thermogenic petroleum deposits, metabolic  
462 reconstructions of 376 MAGs also revealed versatile catabolic capabilities for

463 assimilating carbohydrates, peptides and short chain lipids. This indicates that the  
464 utilization of various types of sedimentary organic carbon (e.g. recent organic matter  
465 deposited with the sediments) is important to the biogeochemistry of deep sea  
466 sediments, including at cold seeps that also receive inputs of thermogenic hydrocarbons  
467 from below<sup>4, 58-60</sup>. Also widespread is the capacity to conserve energy and fix carbon  
468 using electrons derived from inorganic compounds such as sulfide, thiosulfate,  
469 hydrogen, ammonia, and nitrite. With respect to electron acceptors, it is generally  
470 thought that sulfate reduction predominates in marine sediments except where higher-  
471 potential electron acceptors such as oxygen or nitrate are available<sup>61, 62</sup>, or at depths  
472 where sulfate is depleted. While bacteria capable of respiring sulfate, oxygen, nitrate,  
473 and nitrite were detected, these capacities were not prevalent throughout the  
474 community. Instead, many genomes encoded putative reductive dehalogenase genes  
475 for organohalide respiration. Diverse organohalide compounds can be produced  
476 through abiotic and biotic processes in the marine subsurface and are among the  
477 highest-potential oxidants in anoxic ecosystems ( $E^{\circ}$  = 0.24 to 0.58 V). These  
478 compounds may serve as important respiratory electron acceptors for dehalogenating  
479 bacteria and archaea<sup>4, 63</sup>. As suggested by recent studies<sup>63, 64</sup>, the ability to  
480 dehalogenate may provide a competitive advantage that allows organisms to persist in  
481 subsurface sediments. In line with other recent observations<sup>4</sup>, fermentation appears to  
482 be a universal strategy in these sediments, resulting in hydrogen, formate, and acetate  
483 being major end products; accordingly, the majority of the recovered MAGs harboured  
484 the bidirectional [NiFe]-hydrogenase. Fermentation products are likely to serve as  
485 energy sources for other community members harbouring respiratory hydrogenases,  
486 formate dehydrogenases, and the Wood-Ljungdahl pathway.

487 Microbial communities and activities at this newly discovered NW Atlantic deep sea  
488 study site demonstrate that migrated thermogenic hydrocarbons sustain diverse  
489 microbial populations spanning different redox regimes in cold seep sediments. These  
490 include key hydrocarbon degraders, syntrophic partners, and other community  
491 members through interspecies transfer of electrons and metabolites, and degradation of  
492 necromass<sup>20, 65</sup>. These findings indicate that upward migrated thermogenic

493 hydrocarbons are important carbon and energy sources that sustain diverse subseafloor  
494 microbial communities at permanently cold hydrocarbon seeps.

## 495 **Methods**

### 496 **Sampling and geochemical characterization**

497 This study provides a detailed analysis of a 3.44-meter-long piston core taken from the  
498 seabed of the Scotian slope (43.010478 N, 60.211777 W) in 2306 m water depth.  
499 Subsamples were collected immediately from the base of the core and stored in gas-  
500 tight iso-jars flushed with N<sub>2</sub> for headspace gas analysis. Multiple depths ranging from  
501 the deepest portion to within about a metre or so of the top of the core, were  
502 subsampled for geochemical analysis. Additional intervals were preserved for separate  
503 microbiological analyses. Detailed subsampling depths can be found in **Tables 1 and 2**  
504 as well as **Supplementary Table 1**.

505 Hydrocarbon compositions of headspace gas samples were analysed using an Agilent  
506 7890A RGA Gas Chromatograph equipped with Molsieve and Poraplot Q columns and  
507 a flame ionisation detector. Stable carbon and hydrogen isotopic signatures were  
508 determined by Trace GC2000 equipped with a Poraplot Q column, connected to a  
509 Thermo Finnigan Delta plus XP isotope ratio mass spectrometer (IRMS). Sediment  
510 samples were analysed for TOC and EOM using an Agilent 7890A RGA Gas  
511 Chromatograph equipped with a CP-Sil-5 CB-MS column. A Micromass ProSpec-Q  
512 instrument was used for determination of saturated and aromatic fractions. Stable  
513 carbon isotope analyses of these fractions were determined on a Eurovector EA3028  
514 connected to a Nu Horizon IRMS. Experimental procedures on these measurements  
515 followed 'The Norwegian Industry Guide to Organic Geochemical Analyses, Edition 4.0  
516 (30 May 2000)'.

### 517 **Sulfate measurement**

518 Porewater sulfate concentrations were measured in a Dionex ICS-5000 reagent-free ion  
519 chromatography system (Thermo Scientific, CA, USA) equipped with an anion-

520 exchange column (Dionex IonPac AS22; 4 × 250 mm; Thermo Scientific), an EGC-500  
521 K<sub>2</sub>CO<sub>3</sub> eluent generator cartridge and a conductivity detector.

## 522 **Metabolomic analysis**

523 Pore water metabolites were extracted from sediment samples according to previously  
524 reported methods<sup>4</sup>. Mass spectrometric (MS) analysis was carried out using a Thermo  
525 Scientific Q-Exactive™ HF Hybrid Quadrupole-Orbitrap mass spectrometer with an  
526 electrospray ionization source coupled to ultra high-performance liquid chromatography  
527 (UHPLC). Data were acquired in negative ion mode using full scan from 50-750 *m/z* at  
528 240,000 resolution with an automatic gain control (AGC) target of 3e<sup>6</sup> and a maximum  
529 injection time of 200 ms. For MS/MS fragmentation, an isolation window of 1 *m/z* and an  
530 AGC target of 1e<sup>6</sup> was used with a maximum injection time of 100 ms. Data were  
531 analyzed for specific *m/z* ratios using MAVEN software<sup>66</sup>.

## 532 **16S rRNA gene amplicon sequencing**

533 DNA was extracted from sediment samples using the PowerSoil DNA Isolation Kit  
534 (12888-50, QIAGEN). Amplification of the v3-4 region of the bacterial 16S rRNA genes  
535 and the v4-5 region of the archaeal 16S rRNA genes, used primer pairs SD-Bact-0341-  
536 bS17/SD-Bact-0785-aA21 and SD-Arch-0519-aS15/SD-Arch-0911-aA20, respectively<sup>67</sup>.  
537 Amplicon sequencing was performed on a MiSeq benchtop sequencer (Illumina Inc.)  
538 using the 2 × 300 bp MiSeq Reagent Kit v3. Reads were quality controlled and then  
539 clustered into operational taxonomic units (OTUs) of >97% sequence identity with  
540 MetaAmp<sup>68</sup>. Taxonomy was assigned using the SILVA database<sup>69</sup> (release 132).

## 541 **Quantitative PCR**

542 Quantitative polymerase chain reaction (qPCR) analyses were performed on the new  
543 DNA extracts using PowerSoil DNA Isolation Kit (12888-50, QIAGEN) to estimate the  
544 abundance of bacteria and archaea at different depths in the sediment core. The mass  
545 of sediment used for DNA extraction was typically 0.5 g and was always recorded. PCR  
546 reactions were set up using Bio-Rad SsoAdvanced Universal SYBR Green Supermix.

547 Amplification of bacterial and archaeal 16S rRNA genes used domain-specific primers  
548 B27F-B357R and A806F-A958R, respectively. Triplicate PCR was performed on a  
549 Thermo Scientific PikoReal Real-Time PCR Instrument, using reaction conditions  
550 described previously<sup>70</sup>. Results were recorded and analysed by PikoReal software 2.2.

### 551 **Metagenome sequencing**

552 DNA was extracted from the sediment samples using the larger format PowerMax Soil  
553 DNA Isolation Kit (12988-10, QIAGEN) according to the manufacturer's instructions.  
554 Metagenomic library preparation and DNA sequencing using NextSeq 500 System  
555 (Illumina Inc.) were conducted at the Center for Health Genomics and Informatics in the  
556 Cumming School of Medicine, University of Calgary.

### 557 **Microbial diversity analysis**

558 SingleM (<https://github.com/wwood/singlem>) was applied to raw metagenome reads  
559 from each sample<sup>30</sup>. Shannon diversity was calculated based on SingleM counts on 14  
560 single copy marker genes. The vegan package was then used to calculate diversity  
561 based on the rarefied SingleM OTU table across each of the 14 marker genes. The  
562 average was taken as the Shannon index determination for each sample. To explore  
563 microbial composition of each sample, full-length 16S rRNA genes were reconstructed  
564 from metagenomic raw reads using the phyloFlash pipeline<sup>31</sup> together with SILVA  
565 database<sup>69</sup> (release 132).

### 566 **Assembly and binning**

567 Raw reads were quality-controlled by (1) clipping off primers and adapters and (2)  
568 filtering out artifacts and low-quality reads using the BBDuk function of BBTools  
569 (<https://sourceforge.net/projects/bbmap/>). Filtered reads were co-assembled using  
570 MEGAHIT<sup>71</sup> and were individually assembled using metaSPAdes<sup>72</sup>. For co-assembly,  
571 one additional metagenome (315 cmbsf) sequenced using the same method was also  
572 included. This depth was discarded for discussion as it might be contaminated with  
573 seawater (**Supplementary Note 1**). Short contigs (<1000 bp) were removed from



574 assemblies. For each assembly, binning used the Binning module within metaWRAP<sup>35</sup>  
575 (--maxbin2 --metabat1 --metabat2 options). Resulting bins were then consolidated into a  
576 final bin set with metaWRAP's Bin\_refinement module (-c 50 -x 10 options). All binning  
577 results were combined and dereplicated using dRep<sup>73</sup> (-comp 50 -con 10 options). After  
578 dereplication, a total of 376 dereplicated MAGs were obtained.

## 579 **Calculating relative abundances and replication rates**

580 For producing indexed and sorted BAM files, quality-controlled reads from each sample  
581 were mapped to the set of dereplicated genomes using BamM v1.7.3 'make'  
582 (<https://github.com/Ecogenomics/BamM>). To calculate relative abundance of each MAG  
583 within a microbial community in a given sediment depth, CoverM v0.3.1 'genome'  
584 (<https://github.com/wwood/CoverM>) was used to obtain relative abundance of each  
585 genome (parameters: --min-read-percent-identity 0.95 --min-read-aligned-percent 0.75 -  
586 -trim-min 0.10 --trim-max 0.90).

587 Microbial replication rates were estimated with iRep<sup>37</sup> for high-quality dereplicated  
588 MAGs ( $\geq 75\%$  complete,  $\leq 175$  fragments/Mbp sequence, and  $\leq 2\%$  contamination).  
589 Replication rates were retained only if they passed the default thresholds: min cov. = 5,  
590 min wins. = 0.98, min  $r^2$  = 0.9, GC correction min  $r^2$  = 0.0. The require ordered SAM  
591 files were generated using the Bowtie2 (--reorder flag)<sup>74</sup>.

## 592 **Functional annotations**

593 To compare abundances of metabolic genes at different sediment depths, all quality-  
594 controlled reads were aligned against comprehensive custom databases<sup>61</sup> using  
595 DIAMOND BLASTx<sup>75</sup> (cutoffs: e-value:1e-10, identity: 70%; best hits reserved).

596 For contigs, gene calling was performed using Prodigal (-p meta)<sup>76</sup>. Proteins were  
597 predicted against the KEGG database using GhostKOALA<sup>48</sup> and against the Pfam and  
598 TIGRfam HMM models using MetaErg<sup>77</sup>. For individual MAGs, completeness of various  
599 metabolic pathways was determined using KEGG-Decoder<sup>78</sup> and KEGG-Expander

600 (<https://github.com/bjtully/BioData/tree/master/KEGGDecoder>). Annotations of key  
601 metabolic genes were also confirmed by phylogenetic analyses as described below.

602 Genes involved in anaerobic hydrocarbon degradation were screened using BLASTp  
603 (cutoffs: evalue 1e-20 + pident 30% + qcovs 70%) against local protein databases<sup>4</sup>.  
604 After removal of short sequences, they were further manually curated using BLASTp  
605 against NCBI-based nr protein sequences by checking top hits to relevant genes. For  
606 identification of McrA and DsrA, protein sequences were screened against local protein  
607 databases<sup>79</sup> using BLASTp (cutoffs: evalue 1e-20 + pident 30% + qcovs 70%). McrA  
608 and DsrA protein sequences were cross-checked against MetaErg annotations and  
609 phylogenetic analyses, while hydrogenases were confirmed and classified using the  
610 HydDB tool<sup>52</sup>. The dbCAN2 web server<sup>80</sup> was used for carbohydrate-active gene  
611 identification based on retaining proteins found by at least two of the tree tools (HMMER  
612 + DIAMOND + Hotpep) for further analysis.

### 613 **Taxonomy assignments of MAGs**

614 Taxonomy assessment of MAGs was initially performed by identification of 16S rRNA  
615 genes using anvio<sup>81</sup>. Predicted sequences (only 52 in 367 MAGs) were aligned and  
616 classified using SILVA ACT<sup>82</sup>. Subsequently the taxonomy of each MAG was temporally  
617 assigned using GTDB-Tk<sup>83</sup> (using GTDB R04-RS89). Phylogenetic trees were  
618 reconstructed based on concatenation of 43 conserved single-copy genes using  
619 RAxML<sup>84</sup> settings: raxmlHPC-HYBRID -f a -n result -s input -c 25 -N 100 -p 12345 -m  
620 PROTCATLG -x 12345, as reported previously<sup>4</sup>. Bacterial and archaeal reference  
621 genomes were downloaded from NCBI GenBank. Finally, MAGs were identified to  
622 appropriate taxonomic levels according to the NCBI Taxonomy database taking results  
623 of all three of the above methods into account.

### 624 **Phylogenetic analysis of metabolic genes**

625 For *mcrA*, gene sequences were aligned using the MUSCLE algorithm<sup>85</sup> (-maxiters 16)  
626 and trimmed using TrimAL<sup>86</sup> with parameters: -automated1. A maximum-likelihood  
627 phylogenetic tree was built using IQ-Tree<sup>87</sup>, parameters: -st AA -m LG+C60+F+G -bb

628 1000 -alrt 1000 -nt 20. For other key metabolic genes, sequences were aligned using  
629 the ClustalW algorithm included in MEGA7<sup>88</sup>. All alignments were manually inspected.  
630 For amino acid sequences of the group 3 [NiFe]-hydrogenase large subunit, a  
631 neighbour-joining tree was constructed using the Poisson model with gaps treated with  
632 pairwise deletion, bootstrapped with 50 replicates and midpoint-rooted. For amino acid  
633 sequences of other genes, maximum-likelihood trees of were constructed using the JTT  
634 matrix-based model with all sites, bootstrapped with 50 replicates and midpoint-rooted.

### 635 **Data availability**

636 DNA sequences have been deposited in NCBI BioProject databases with accession  
637 number PRJNA598277 (<https://www.ncbi.nlm.nih.gov/bioproject/>). The authors declare  
638 that all other data supporting the findings of this study are available within the article  
639 and its supplementary information files, or from the corresponding authors upon request.

### 640 **References**

- 641 1. Etiope, G. et al. A thermogenic hydrocarbon seep in shallow Adriatic Sea (Italy):  
642 Gas origin, sediment contamination and benthic foraminifera. *Mar Petrol Geol* **57**,  
643 283-293 (2014).
- 644 2. Suess, E. Marine cold seeps and their manifestations: geological control,  
645 biogeochemical criteria and environmental conditions. *Int J Earth Sci* **103**, 1889-  
646 1916 (2014).
- 647 3. Orcutt, B.N. et al. Impact of natural oil and higher hydrocarbons on microbial  
648 diversity, distribution, and activity in Gulf of Mexico cold-seep sediments. *Deep*  
649 *Sea Res Pt II* **57**, 2008-2021 (2010).
- 650 4. Dong, X. et al. Metabolic potential of uncultured bacteria and archaea associated  
651 with petroleum seepage in deep-sea sediments. *Nat Commun* **10**, 1816 (2019).
- 652 5. Jaekel, U. et al. Anaerobic degradation of propane and butane by sulfate-  
653 reducing bacteria enriched from marine hydrocarbon cold seeps. *ISME J* **7**, 885-  
654 895 (2013).

- 655 6. Kleindienst, S. et al. Diverse sulfate-reducing bacteria of the  
656 *Desulfosarcina/Desulfococcus* clade are the key alkane degraders at marine  
657 seeps. *ISME J* **8**, 2029-2044 (2014).
- 658 7. Ruff, S.E. et al. Global dispersion and local diversification of the methane seep  
659 microbiome. *Proc Natl Acad Sci U S A* **112**, 4015-4020 (2015).
- 660 8. Teske, A. in *Microbial Communities Utilizing Hydrocarbons and Lipids: Members,*  
661 *Metagenomics and Ecophysiology.* (ed. T.J. McGenity) 1-31 (Springer  
662 International Publishing, Cham; 2019).
- 663 9. Kniemeyer, O. et al. Anaerobic oxidation of short-chain hydrocarbons by marine  
664 sulphate-reducing bacteria. *Nature* **449**, 898-901 (2007).
- 665 10. Vigneron, A. et al. Contrasting Pathways for Anaerobic Methane Oxidation in  
666 Gulf of Mexico Cold Seep Sediments. *mSystems* **4**, e00091-00018 (2019).
- 667 11. Vigneron, A. et al. Archaeal and anaerobic methane oxidizer communities in the  
668 Sonora Margin cold seeps, Guaymas Basin (Gulf of California). *ISME J* **7**, 1595-  
669 1608 (2013).
- 670 12. Petro, C. et al. Single-cell amplified genomes of two uncultivated members of the  
671 deltaproteobacterial SEEP-SRB1 clade, isolated from marine sediment. *Mar*  
672 *Genomics* **46**, 66-69 (2019).
- 673 13. Joye, S.B. The Geology and Biogeochemistry of Hydrocarbon Seeps. *Annu Rev*  
674 *Earth Planet Sci* **48** (2020).
- 675 14. Joye, S.B. et al. Metabolic variability in seafloor brines revealed by carbon and  
676 sulphur dynamics. *Nat Geosci* **2**, 349-354 (2009).
- 677 15. Wang, Y., Wegener, G., Hou, J., Wang, F. & Xiao, X. Expanding anaerobic  
678 alkane metabolism in the domain of Archaea. *Nat Microbiol* **4**, 595-602 (2019).
- 679 16. Leu, A.O. et al. Anaerobic methane oxidation coupled to manganese reduction  
680 by members of the *Methanoperedenaceae*. *ISME J* (2020).
- 681 17. Chen, S.C. et al. Anaerobic oxidation of ethane by archaea from a marine  
682 hydrocarbon seep. *Nature* **568**, 108-111 (2019).
- 683 18. Laso-Perez, R. et al. Thermophilic archaea activate butane via alkyl-coenzyme M  
684 formation. *Nature* **539**, 396-401 (2016).

- 685 19. DiDonato, R.J., Jr. et al. Genome sequence of the deltaproteobacterial strain  
686 NaphS2 and analysis of differential gene expression during anaerobic growth on  
687 naphthalene. *PLoS One* **5**, e14072 (2010).
- 688 20. Dong, X. et al. Fermentative Spirochaetes mediate necromass recycling in  
689 anoxic hydrocarbon-contaminated habitats. *ISME J* **12**, 2039-2050 (2018).
- 690 21. Dombrowski, N., Seitz, K.W., Teske, A.P. & Baker, B.J. Genomic insights into  
691 potential interdependencies in microbial hydrocarbon and nutrient cycling in  
692 hydrothermal sediments. *Microbiome* **5**, 106 (2017).
- 693 22. Dombrowski, N., Teske, A.P. & Baker, B.J. Expansive microbial metabolic  
694 versatility and biodiversity in dynamic Guaymas Basin hydrothermal sediments.  
695 *Nat Commun* **9**, 4999 (2018).
- 696 23. Seitz, K.W. et al. Asgard archaea capable of anaerobic hydrocarbon cycling. *Nat*  
697 *Commun* **10**, 1822 (2019).
- 698 24. Laso-Perez, R. et al. Anaerobic Degradation of Non-Methane Alkanes by  
699 "*Candidatus Methanoliparia*" in Hydrocarbon Seeps of the Gulf of Mexico. *mBio*  
700 **10**, e01814-01819 (2019).
- 701 25. Orsi, W.D., Edgcomb, V.P., Christman, G.D. & Biddle, J.F. Gene expression in  
702 the deep biosphere. *Nature* **499**, 205-208 (2013).
- 703 26. Gittel, A. et al. Ubiquitous Presence and Novel Diversity of Anaerobic Alkane  
704 Degraders in Cold Marine Sediments. *Front Microbiol* **6**, 1414 (2015).
- 705 27. Campbell, D.C., 2019. CCGS Hudson Expedition 2016-011, phase 2. Cold seep  
706 investigations on the Scotian Slope, offshore Nova Scotia, June 15-July 6, 2016.  
707 Geological Survey of Canada, Open File 8525, 2019, 88 pages,  
708 <https://doi.org/10.4095/313603>.
- 709 28. Milkov, A.V. & Etiope, G. Revised genetic diagrams for natural gases based on a  
710 global dataset of > 20,000 samples. *Org Geochem* **125**, 109-120 (2018).
- 711 29. Atlas, R.M. Petroleum biodegradation and oil spill bioremediation. *Mar Pollut Bull*  
712 **31**, 178-182 (1995).
- 713 30. Woodcroft, B.J. et al. Genome-centric view of carbon processing in thawing  
714 permafrost. *Nature* **560**, 49-54 (2018).

- 715 31. Gruber-Vodicka, H.R., Seah, B.K.B. & Pruesse, E. phyloFlash – Rapid SSU  
716 rRNA profiling and targeted assembly from metagenomes. *bioRxiv*, 521922  
717 (2019).
- 718 32. Starnawski, P. et al. Microbial community assembly and evolution in subseafloor  
719 sediment. *Proc Natl Acad Sci U S A* **114**, 2940-2945 (2017).
- 720 33. Petro, C., Starnawski, P., Schramm, A. & Kjeldsen, K.U. Microbial community  
721 assembly in marine sediments. *Aquat Microb Ecol* **79**, 177-195 (2017).
- 722 34. Stewart, R.D. et al. Assembly of 913 microbial genomes from metagenomic  
723 sequencing of the cow rumen. *Nat Commun* **9**, 870 (2018).
- 724 35. Uritskiy, G.V., DiRuggiero, J. & Taylor, J. MetaWRAP-a flexible pipeline for  
725 genome-resolved metagenomic data analysis. *Microbiome* **6**, 158 (2018).
- 726 36. Parks, D.H., Imelfort, M., Skennerton, C.T., Hugenholtz, P. & Tyson, G.W.  
727 CheckM: assessing the quality of microbial genomes recovered from isolates,  
728 single cells, and metagenomes. *Genome Res* **25**, 1043-1055 (2015).
- 729 37. Brown, C.T., Olm, M.R., Thomas, B.C. & Banfield, J.F. Measurement of bacterial  
730 replication rates in microbial communities. *Nat Biotechnol* **34**, 1256-1263 (2016).
- 731 38. Borrel, G. et al. Wide diversity of methane and short-chain alkane metabolisms in  
732 uncultured archaea. *Nat Microbiol* **4**, 603-613 (2019).
- 733 39. Evans, P.N. et al. An evolving view of methane metabolism in the Archaea. *Nat*  
734 *Rev Microbiol* **17**, 219-232 (2019).
- 735 40. Wang, Y., Feng, X., Natarajan, V.P., Xiao, X. & Wang, F. Diverse anaerobic  
736 methane- and multi-carbon alkane-metabolizing archaea coexist and show  
737 activity in Guaymas Basin hydrothermal sediment. *Environ Microbiol* **21**, 1344-  
738 1355 (2019).
- 739 41. Hallam, S.J. et al. Reverse methanogenesis: testing the hypothesis with  
740 environmental genomics. *Science* **305**, 1457-1462 (2004).
- 741 42. Boyd, J.A. et al. Divergent methyl-coenzyme M reductase genes in a deep-  
742 subseafloor *Archaeoglobi*. *ISME J* **13**, 1269-1279 (2019).
- 743 43. Rabus, R. et al. Anaerobic Microbial Degradation of Hydrocarbons: From  
744 Enzymatic Reactions to the Environment. *J Mol Microbiol Biotechnol* **26**, 5-28  
745 (2016).



- 746 44. Davidova, I.A., Marks, C.R. & Suflita, J.M. in *Taxonomy, Genomics and*  
747 *Ecophysiology of Hydrocarbon-Degrading Microbes.* (ed. T.J. McGenity) 1-38  
748 (Springer International Publishing, Cham; 2018).
- 749 45. Tan, B. et al. Comparative analysis of metagenomes from three methanogenic  
750 hydrocarbon-degrading enrichment cultures with 41 environmental samples.  
751 *ISME J* **9**, 2028-2045 (2015).
- 752 46. Callaghan, A.V. et al. The genome sequence of *Desulfatibacillum alkenivorans*  
753 AK-01: a blueprint for anaerobic alkane oxidation. *Environ Microbiol* **14**, 101-113  
754 (2012).
- 755 47. Porter, A.W. & Young, L.Y. in *Advances in Applied Microbiology*, Vol. 88. (eds. S.  
756 Sariaslani & G.M. Gadd) 167-203 (Academic Press, 2014).
- 757 48. Lombard, V., Golaconda Ramulu, H., Drula, E., Coutinho, P.M. & Henrissat, B.  
758 The carbohydrate-active enzymes database (CAZy) in 2013. *Nucleic Acids Res*  
759 **42**, D490-495 (2014).
- 760 49. Greening, C. et al. Genomic and metagenomic surveys of hydrogenase  
761 distribution indicate H<sub>2</sub> is a widely utilised energy source for microbial growth and  
762 survival. *ISME J* **10**, 761 (2015).
- 763 50. Muller, A.L., Kjeldsen, K.U., Rattei, T., Pester, M. & Loy, A. Phylogenetic and  
764 environmental diversity of DsrAB-type dissimilatory (bi)sulfite reductases. *ISME J*  
765 **9**, 1152-1165 (2015).
- 766 51. Kublik, A. et al. Identification of a multi-protein reductive dehalogenase complex  
767 in *Dehalococcoides mccartyi* strain CBDB1 suggests a protein-dependent  
768 respiratory electron transport chain obviating quinone involvement. *Environ*  
769 *Microbiol* **18**, 3044-3056 (2016).
- 770 52. Sondergaard, D., Pedersen, C.N. & Greening, C. HydDB: A web tool for  
771 hydrogenase classification and analysis. *Sci Rep* **6**, 34212 (2016).
- 772 53. Musat, F. The anaerobic degradation of gaseous, nonmethane alkanes - From in  
773 situ processes to microorganisms. *Comput Struct Biotechnol J* **13**, 222-228  
774 (2015).
- 775 54. Gieg, L.M. & Toth, C.R.A. in *Anaerobic Utilization of Hydrocarbons, Oils, and*  
776 *Lipids.* (ed. M. Boll) 1-30 (Springer International Publishing, Cham; 2017).

- 777 55. Tan, B., Nesbo, C. & Foght, J. Re-analysis of omics data indicates *Smithella* may  
778 degrade alkanes by addition to fumarate under methanogenic conditions. *ISME J*  
779 **8**, 2353-2356 (2014).
- 780 56. Anantharaman, K. et al. Thousands of microbial genomes shed light on  
781 interconnected biogeochemical processes in an aquifer system. *Nat Commun* **7**,  
782 13219 (2016).
- 783 57. Castelle, C.J. & Banfield, J.F. Major New Microbial Groups Expand Diversity and  
784 Alter our Understanding of the Tree of Life. *Cell* **172**, 1181-1197 (2018).
- 785 58. D'Hondt, S., Pockalny, R., Fulfer, V.M. & Spivack, A.J. Subseafloor life and its  
786 biogeochemical impacts. *Nat Commun* **10**, 3519 (2019).
- 787 59. Lever, M.A. et al. Life under extreme energy limitation: a synthesis of laboratory-  
788 and field-based investigations. *FEMS Microbiol Rev* **39**, 688-728 (2015).
- 789 60. Lloyd, K.G. et al. Predominant archaea in marine sediments degrade detrital  
790 proteins. *Nature* **496**, 215-218 (2013).
- 791 61. Kessler, A.J. et al. Bacterial fermentation and respiration processes are  
792 uncoupled in anoxic permeable sediments. *Nat Microbiol* **4**, 1014-1023 (2019).
- 793 62. Orsi, W.D. Ecology and evolution of seafloor and subseafloor microbial  
794 communities. *Nat Rev Microbiol* **16**, 671-683 (2018).
- 795 63. Spang, A. et al. Proposal of the reverse flow model for the origin of the eukaryotic  
796 cell based on comparative analyses of Asgard archaeal metabolism. *Nat*  
797 *Microbiol* **4**, 1138-1148 (2019).
- 798 64. Manoharan, L. et al. Metagenomes from Coastal Marine Sediments Give Insights  
799 into the Ecological Role and Cellular Features of *Loki*- and *Thorarchaeota*. *mBio*  
800 **10**, e02039-02019 (2019).
- 801 65. Bradley, J.A., Amend, J.P. & LaRowe, D.E. Necromass as a Limited Source of  
802 Energy for Microorganisms in Marine Sediments. *J Geophys Res-Biogeosci* **123**,  
803 577-590 (2018).
- 804 66. Melamud, E., Vastag, L. & Rabinowitz, J.D. Metabolomic analysis and  
805 visualization engine for LC-MS data. *Anal Chem* **82**, 9818-9826 (2010).

- 806 67. Klindworth, A. et al. Evaluation of general 16S ribosomal RNA gene PCR primers  
807 for classical and next-generation sequencing-based diversity studies. *Nucleic*  
808 *Acids Res* **41**, e1 (2013).
- 809 68. Dong, X. et al. Fast and Simple Analysis of MiSeq Amplicon Sequencing Data  
810 with MetaAmp. *Front Microbiol* **8**, 1461 (2017).
- 811 69. Yilmaz, P. et al. The SILVA and "All-species Living Tree Project (LTP)"  
812 taxonomic frameworks. *Nucleic Acids Res* **42**, D643-648 (2014).
- 813 70. Hoshino, T. & Inagaki, F. Abundance and distribution of Archaea in the  
814 subseafloor sedimentary biosphere. *ISME J* **13**, 227-231 (2019).
- 815 71. Li, D. et al. MEGAHIT v1.0: A fast and scalable metagenome assembler driven  
816 by advanced methodologies and community practices. *Methods* **102**, 3-11 (2016).
- 817 72. Nurk, S., Meleshko, D., Korobeynikov, A. & Pevzner, P.A. metaSPAdes: a new  
818 versatile metagenomic assembler. *Genome Res* **27**, 824-834 (2017).
- 819 73. Olm, M.R., Brown, C.T., Brooks, B. & Banfield, J.F. dRep: a tool for fast and  
820 accurate genomic comparisons that enables improved genome recovery from  
821 metagenomes through de-replication. *ISME J* **11**, 2864-2868 (2017).
- 822 74. Langmead, B., Trapnell, C., Pop, M. & Salzberg, S.L. Ultrafast and memory-  
823 efficient alignment of short DNA sequences to the human genome. *Genome Biol*  
824 **10**, R25 (2009).
- 825 75. Buchfink, B., Xie, C. & Huson, D.H. Fast and sensitive protein alignment using  
826 DIAMOND. *Nat Methods* **12**, 59 (2014).
- 827 76. Hyatt, D. et al. Prodigal: prokaryotic gene recognition and translation initiation  
828 site identification. *BMC Bioinformatics* **11**, 119 (2010).
- 829 77. Dong, X. & Strous, M. An Integrated Pipeline for Annotation and Visualization of  
830 Metagenomic Contigs. *Front Genet* **10**, 999 (2019).
- 831 78. Graham, E.D., Heidelberg, J.F. & Tully, B.J. Potential for primary productivity in a  
832 globally-distributed bacterial phototroph. *ISME J* **12**, 1861-1866 (2018).
- 833 79. Greening, C. et al. Diverse hydrogen production and consumption pathways  
834 influence methane production in ruminants. *ISME J* **13**, 2617-2632 (2019).
- 835 80. Zhang, H. et al. dbCAN2: a meta server for automated carbohydrate-active  
836 enzyme annotation. *Nucleic Acids Res* **46**, W95-W101 (2018).

- 837 81. Eren, A.M. et al. Anvi'o: an advanced analysis and visualization platform for  
838 'omics data. *PeerJ* **3**, e1319 (2015).
- 839 82. Pruesse, E., Peplies, J. & Glockner, F.O. SINA: accurate high-throughput  
840 multiple sequence alignment of ribosomal RNA genes. *Bioinformatics* **28**, 1823-  
841 1829 (2012).
- 842 83. Chaumeil, P.A., Mussig, A.J., Hugenholtz, P. & Parks, D.H. GTDB-Tk: a toolkit to  
843 classify genomes with the Genome Taxonomy Database. *Bioinformatics* (2019).
- 844 84. Stamatakis, A. RAxML version 8: a tool for phylogenetic analysis and post-  
845 analysis of large phylogenies. *Bioinformatics* **30**, 1312-1313 (2014).
- 846 85. Edgar, R.C. MUSCLE: multiple sequence alignment with high accuracy and high  
847 throughput. *Nucleic Acids Res* **32**, 1792-1797 (2004).
- 848 86. Capella-Gutierrez, S., Silla-Martinez, J.M. & Gabaldon, T. trimAl: a tool for  
849 automated alignment trimming in large-scale phylogenetic analyses.  
850 *Bioinformatics* **25**, 1972-1973 (2009).
- 851 87. Nguyen, L.T., Schmidt, H.A., von Haeseler, A. & Minh, B.Q. IQ-TREE: a fast and  
852 effective stochastic algorithm for estimating maximum-likelihood phylogenies.  
853 *Mol Biol Evol* **32**, 268-274 (2015).
- 854 88. Kumar, S., Stecher, G. & Tamura, K. MEGA7: Molecular Evolutionary Genetics  
855 Analysis Version 7.0 for Bigger Datasets. *Mol Biol Evol* **33**, 1870-1874 (2016).

856

## 857 **Acknowledgements**

858 The work was supported by Genome Canada Genomics Applications Partnership  
859 Program (GAPP) and Canada Foundation for Innovation (CFI-JELF 33752) awards to  
860 C.R.J.H., who is supported by a Campus Alberta Innovates Program Chair. X.D. is  
861 supported by National Natural Science Foundation of China (Grant No. 41906076) and  
862 the Fundamental Research Funds for the Central Universities (Grant No. 19lgpy90).  
863 Metabolomics data were obtained at the Calgary Metabolomics Research Facility  
864 (CMRF), which is supported by the International Microbiome Centre and the Canada  
865 Foundation for Innovation (CFI-JELF 34986) awards to I.A.L., who is supported by an

866 Alberta Innovates Translational Health Chair. C.G. is supported by an ARC DECRA  
867 Fellowship (DE170100310) and an ARC Discovery Project (DP180101762). We thank  
868 Weiling Pi, Chuwen Zhang, Zexin Li and Haoyu Lan for help with figure preparation,  
869 Ben Woodcroft for help with CoverM software, and Rhonda Clark for research support.

#### 870 **Author contributions**

871 C.R.J.H. obtained the funding for this project. X.D. and C.R.J.H. designed the study.  
872 X.D. processed metagenome data. J.E.R., S.M., R.A.G. and I.A.L. performed  
873 metabolomics analyses and data interpretation. D.C.C. was the chief scientist aboard  
874 the CCGS *Hudson* and was responsible for sediment sampling. M.F., J.W. and A.M.  
875 designed and performed petroleum geochemical analyses. C.G. performed  
876 phylogenetic analysis of key metabolic genes. C.L. conducted amplicon sequencing and  
877 analyses. A. C. performed microbial diversity analyses. O.A. performed porewater  
878 sulfate measurements. S.W. and D.M. conducted qPCR analyses. X.D., C.G. and  
879 C.R.J.H. drafted the manuscript. All authors reviewed the results and participated in the  
880 writing of the manuscript.

#### 881 **Competing interest**

882 The authors declare no conflict of interest.

883 **Tables and Figures**

884 **Table 1.** Molecular and isotopic compositions of two gas samples sourced from  
885 sediments subsampled from the core regions nearest gas hydrates.

| Depth (cmbsf)               |                               | 332-337      | 337-344     |
|-----------------------------|-------------------------------|--------------|-------------|
| Features                    |                               | Bubbling gas | Gas hydrate |
| Gas compositions<br>(% THG) | Methane                       | 85.10        | 79.00       |
|                             | Ethane                        | 2.00         | 1.38        |
|                             | Propane                       | 3.10         | 1.25        |
|                             | <i>iso</i> -butane            | 0.93         | 0.36        |
|                             | <i>n</i> -butane              | 0.51         | 0.23        |
|                             | $\Sigma C_2-C_4$              | 6.54         | 3.22        |
|                             | THG (ppm)                     | 7446         | 4029        |
|                             | $C_1/(C_2+C_3)$               | 16.7         | 30.0        |
| Isotopic signatures<br>(‰)  | $C_1 \delta^{13}C$            | -42.2        | -49.0       |
|                             | $C_1 \delta^2H$               | -169         | -177        |
|                             | $C_2 \delta^{13}C$            | -24          | -26         |
|                             | $C_3 \delta^{13}C$            | -21.5        | -22.3       |
|                             | <i>i</i> - $C_4 \delta^{13}C$ | -22.6        | ND          |
|                             | <i>n</i> - $C_4 \delta^{13}C$ | -21.6        | ND          |
|                             | $CO_2 \delta^{13}C$           | -6.3         | -7.7        |

886 Abbreviations:  $C_1$ , methane;  $C_2$ , ethane;  $C_3$ , propane;  $C_4$ , butane. THG, total  
887 hydrocarbon gases.  $C_1/(C_2+C_3)$ , molecular ratios of methane to ethane and propane.  
888  $\delta^{13}C$  and  $\delta^2H$ , stable carbon and hydrogen isotope composition. ND, not determined.

889



890 **Table 2.** Key features of sediment samples used for microbiological analyses.

| Samples | Depths (cmbsf) | Biogeochemical zone        | Filtered paired reads | Shannon index* | Bacterial qPCR 16S rRNA** | Archaeal qPCR 16S rRNA** |
|---------|----------------|----------------------------|-----------------------|----------------|---------------------------|--------------------------|
| S1      | 0              | Mixing                     | 61,241,391            | 6.70 ± 0.04    | 2.64 E+09                 | 0.113 E+09               |
| S2      | 20             | Sulfate reduction          | 59,469,560            | 5.58 ± 0.10    | 2.22 E+09                 | 0.052 E+09               |
| S3      | 60             | Sulfate methane transition | 57,920,960            | 3.60 ± 0.23    | 1.57 E+09                 | 1.230 E+09               |
| S4      | 100            | Methanogenic               | 54,671,031            | 5.05 ± 0.13    | 0.13 E+09                 | 0.010 E+09               |
| S5      | 150            | Methanogenic               | 53,856,875            | 4.97 ± 0.10    | 0.14 E+09                 | 0.022 E+09               |
| S6      | 200            | Methanogenic               | 95,943,312            | 5.36 ± 0.08    | 0.06 E+09                 | 0.004 E+09               |
| S7      | 250            | Methanogenic               | 70,775,877            | 4.99 ± 0.12    | 0.23 E+09                 | 0.016 E+09               |

891 \* Shannon index was calculated from metagenomes using 14 single-copy marker genes.

892 \*\* Bacterial and archaeal numbers were estimated by qPCR, expressed as 16S rRNA genes per g sediment.

893 **Figure 1. Gene- and genome-resolved view of the microbial communities.** (a)  
894 Distribution of bacterial and archaeal taxa at different sediment depths. Top panels:  
895 relative abundance based on 16S rRNA gene amplicon analysis; bottom panels:  
896 reconstruction of full-length 16S rRNA genes from the metagenomes. Archaeal groups  
897 are shown on the left and bacterial groups are shown on the right. (b) Phylogenetic  
898 placement of 376 reconstructed metagenome-assembled genomes. A maximum-  
899 likelihood phylogenomic tree was built based on concatenated amino acid sequences of  
900 43 conserved single-copy genes using RAXML with the PROTGAMMALG model. The  
901 scale bar represents 1 amino acid substitution per sequence position. Numbers in  
902 parentheses show total MAGs recovered. Phyla with only one detected MAG are not  
903 labelled. Ten MAGs corresponded to unclassified phylum-level lineages (green  
904 branches; unlabelled). The full tree file with references is available in **Supplementary**  
905 **Data 1.**

906 **Figure 2. Occurrence of core metabolic genes or functions in unassembled**  
907 **quality-filtered reads and phylogenetic clusters of MAGs.** (a) Depth-differentiated  
908 metabolic capacity based on normalized short-read counts of genes encoding the  
909 catalytic subunits of key metabolic enzymes in unassembled quality-filtered reads. (b)  
910 Core metabolic genes or pathways and their occurrence (in %) in MAGs grouped into  
911 35 different phylogenetic clusters. Metabolic categories (from top to bottom): central  
912 metabolism, mixed acid fermentation, carbon fixation, oxygen and carbon monoxide  
913 metabolism, nitrogen metabolism, sulfur metabolism, hydrogen metabolism, reductive  
914 dehalogenation, and hydrocarbon degradation. Phyla with only one representative MAG  
915 in the dataset (n=10) and MAGs that could not be classified (n=10) are grouped  
916 together (Others; far right). Shaded colors: gene present in 1-50% of  
917 genomes/phylogenetic cluster. Solid colors: gene present in 50-100% of  
918 genomes/cluster. Complete lists of metabolic genes or pathways can be found in  
919 **Supplementary Tables 4 and 6-12.**

920 **Figure 3. Maximum likelihood phylogenetic trees of MAGs and the detected**  
921 **methyl-Coenzyme M reductase (McrA) sequences.** (a) Phylogenomic tree  
922 constructed based on alignments of 43 conserved protein sequences from

923 *Methanomicrobia* MAGs; (b) phylogenetic tree constructed based on alignments of  
924 amino acid sequences of *mcrA* genes. Bootstrap values of >70% are indicated with  
925 black circles. MAGs and McrA sequences corresponding to the same alkane  
926 metabolisms are highlighted in the same color in the two trees. Scale bars correspond  
927 to per cent average amino acid substitution over the alignment, for both trees.  
928 Sequences for amino acids used to construct McrA trees can be found in  
929 **Supplementary Data 2**.

930 **Figure 4. Predicted metabolic models for anaerobic oxidation of gaseous alkanes**  
931 **based on archaeal MAGs harboring *mcrA* genes.** (a) Archaeal oxidation of methane;  
932 (b) archaeal oxidation of ethane; and (c) archaeal oxidation of butane. Red font  
933 indicates that not all MAGs retrieved encode the enzyme (numbers of MAGs encoding  
934 the enzyme are indicated in parentheses). Dashed lines indicate steps catalyzed by  
935 unconfirmed enzymes. SC alkanes, short chain alkanes. Percentages above each panel  
936 indicate the completeness of the corresponding MAGs estimated by CheckM. Details on  
937 the annotation of the enzymes are presented in **Supplementary Table 6**.

938 **Figure 5. Heatmap of metabolites identified in sediment pore water from down**  
939 **core sediment subsamples.** Metabolite levels were measured using HPLC Orbitrap  
940 mass spectrometry and are expressed as cumulative sum logarithmically normalized  
941 peak areas of sample replicates (n = 3). Compound names are listed above the  
942 heatmap.

943 **Figure 6. Predicted metabolic models for anaerobic degradation of alkanes and**  
944 **benzoate based on bacterial MAGs harboring *assA* and *bcr* genes.** Proposed  
945 metabolic pathways for anaerobic degradation of (a) propane and (b) toluene via  
946 addition to fumarate. Propane and toluene here serve as examples for illustrating  
947 anaerobic degradation of alkane and aromatic hydrocarbons more generally. (c)  
948 Occurrence of protein encoding genes involved in these pathways in bacterial MAGs, as  
949 a presence/absence (filled/white squares) matrix. Genome completeness (%) for each  
950 MAG as estimated by CheckM is indicated. Details on the annotation of the enzymes  
951 are presented in **Supplementary Tables 7 and 8**.

952 **Figure 1**

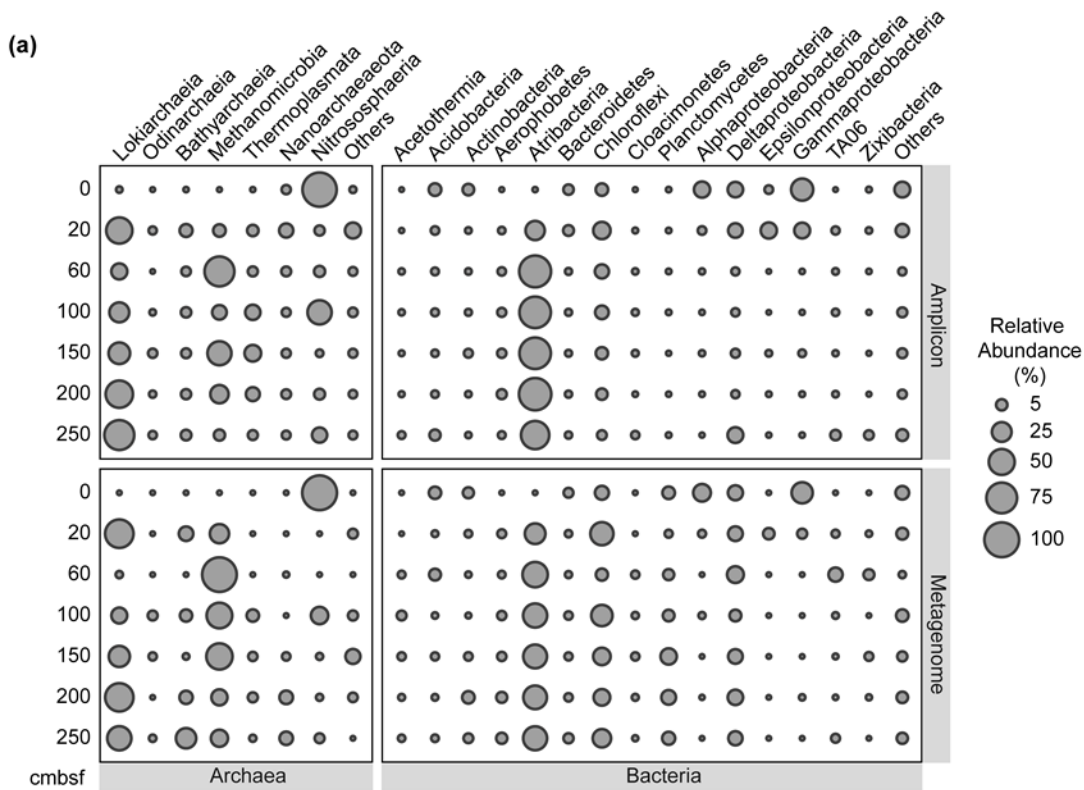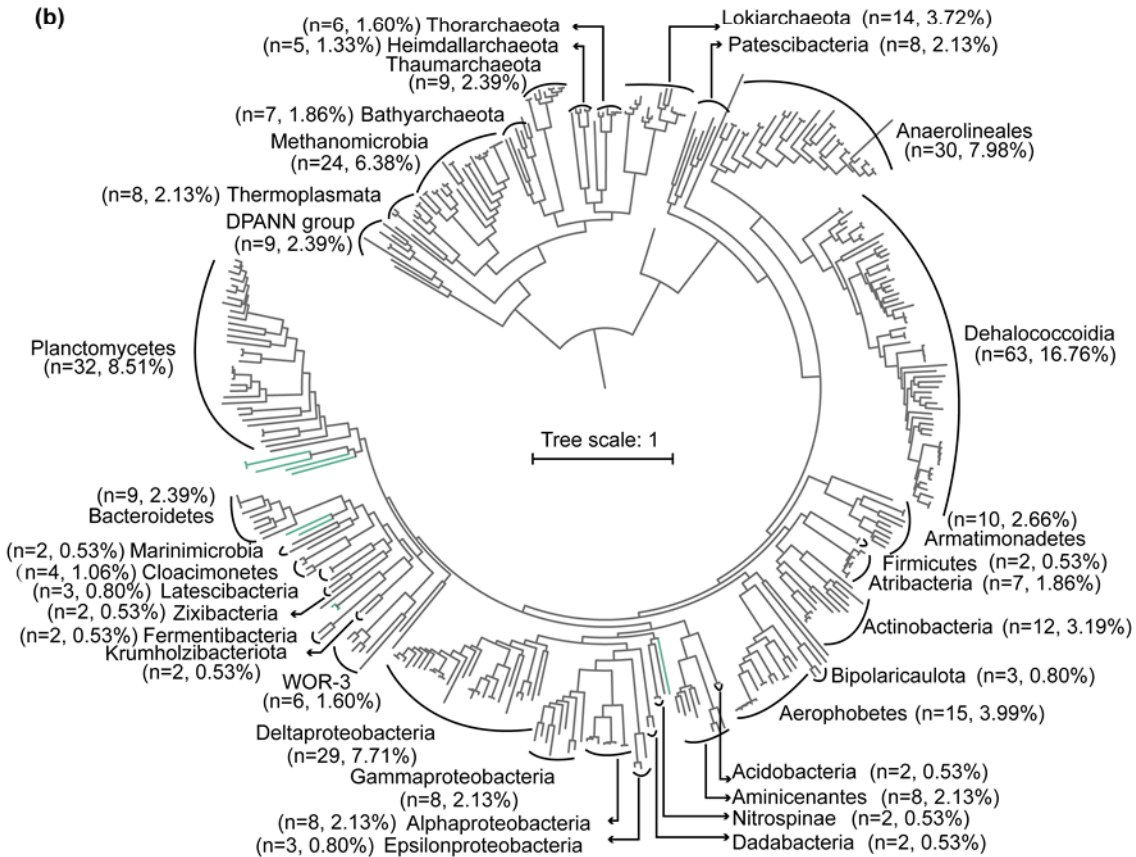

953

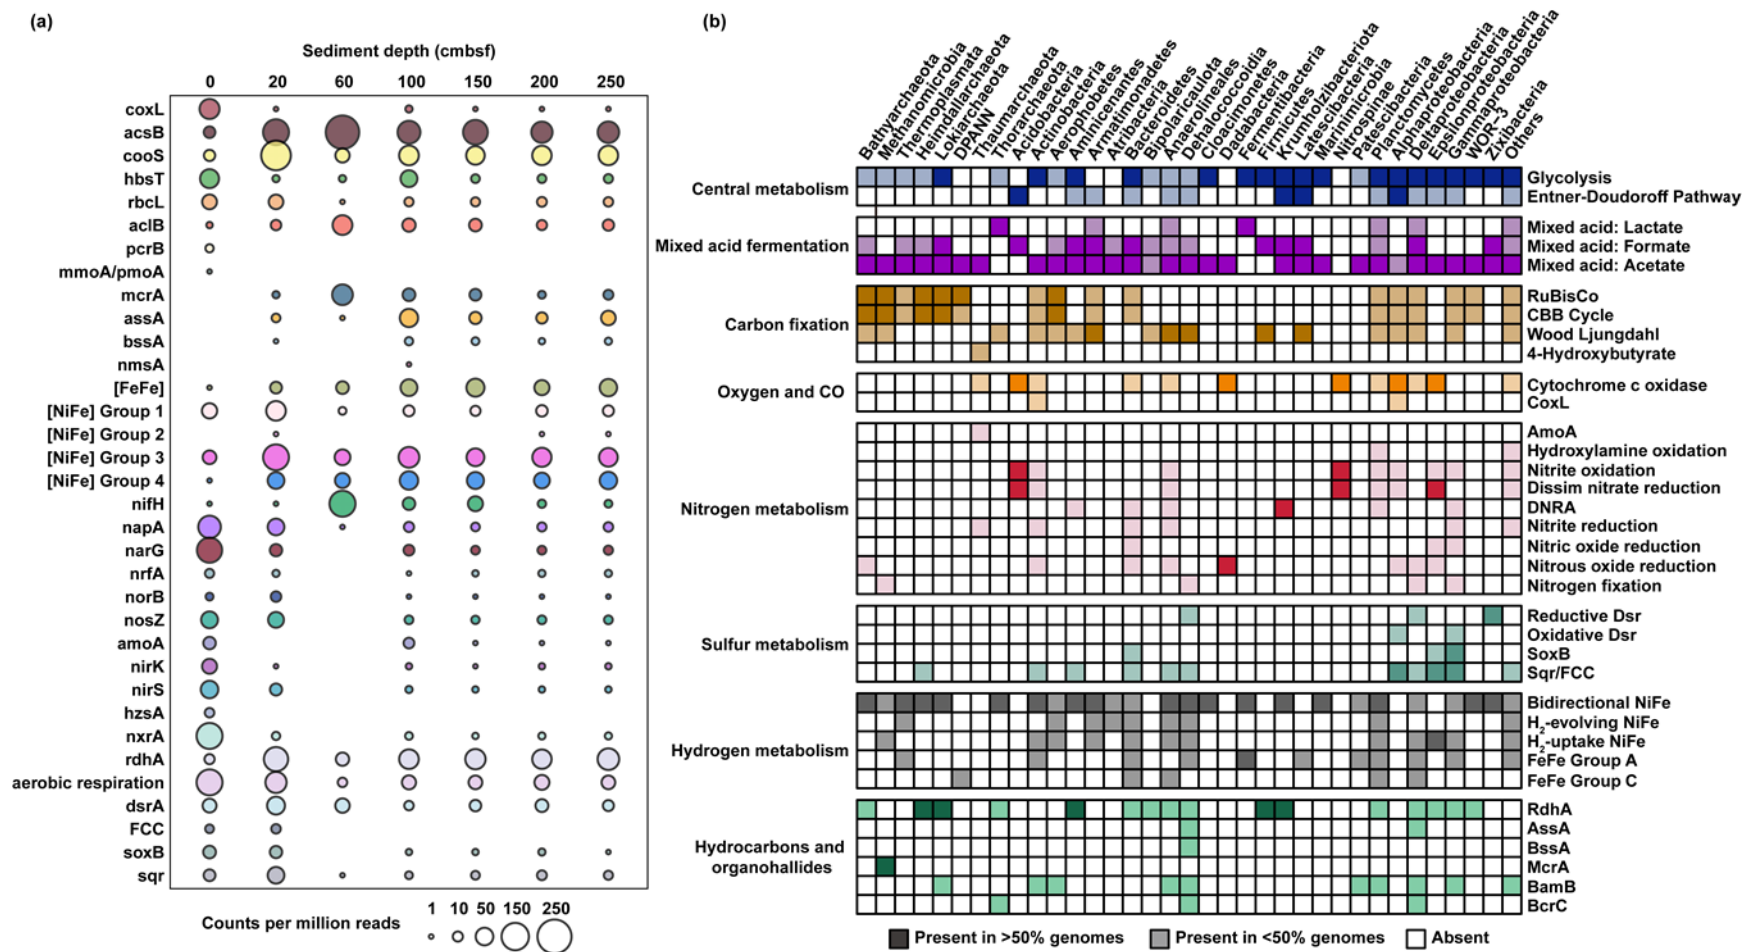



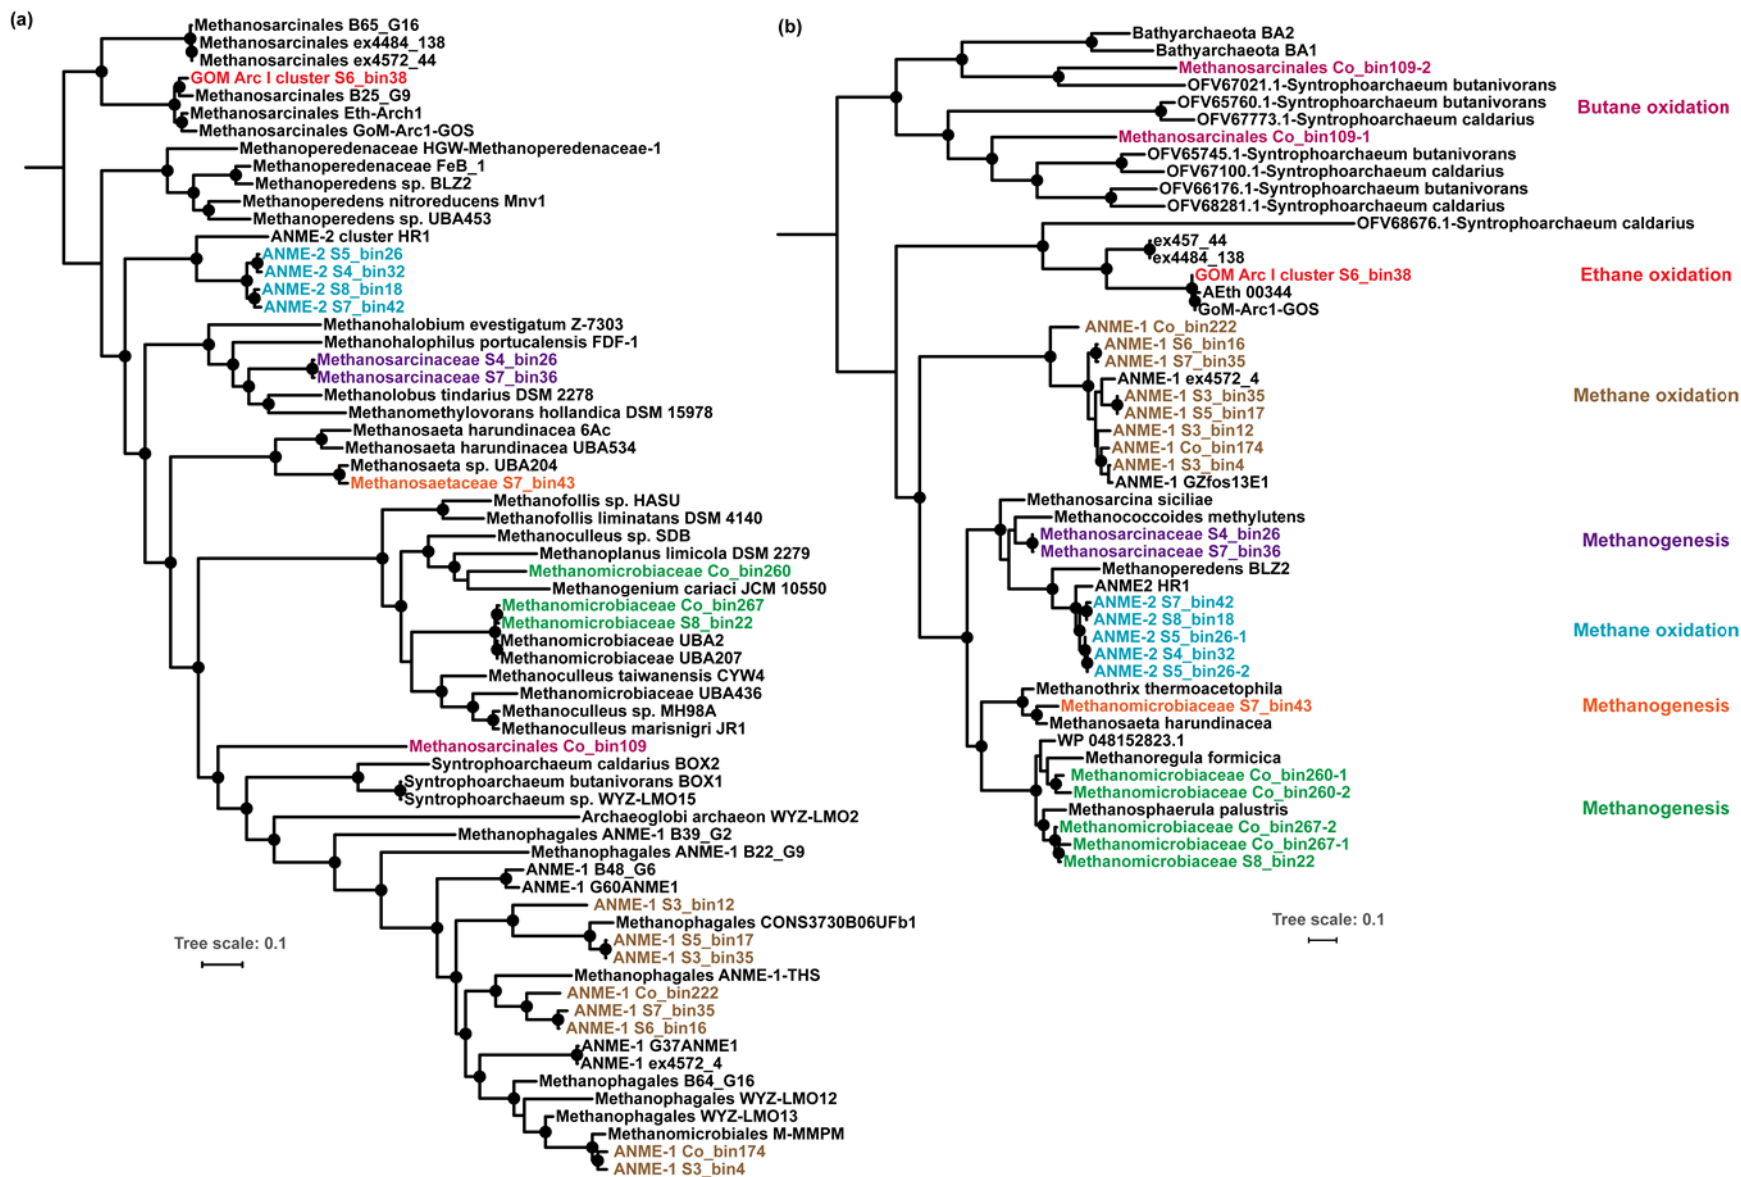



(a) ANME1 (n=8, 61~91%) and ANME2 (n=4, 66~96%)

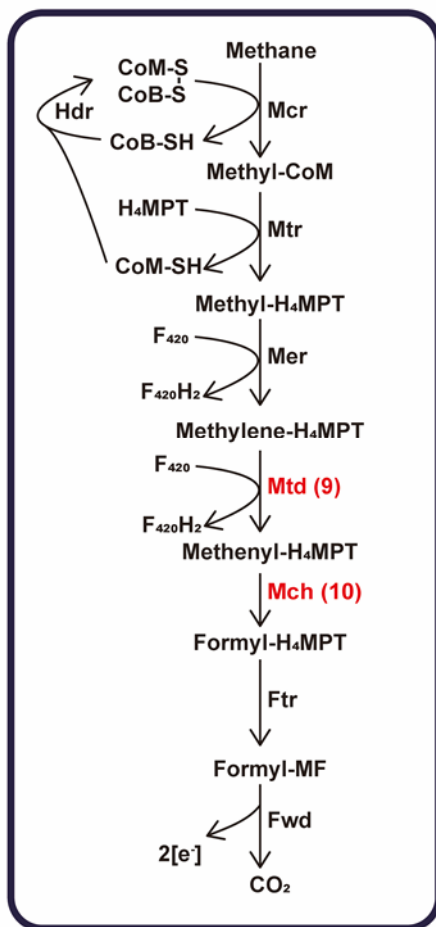

(b) GoM-Arc1 S6\_bin38 (n=1, 90%)

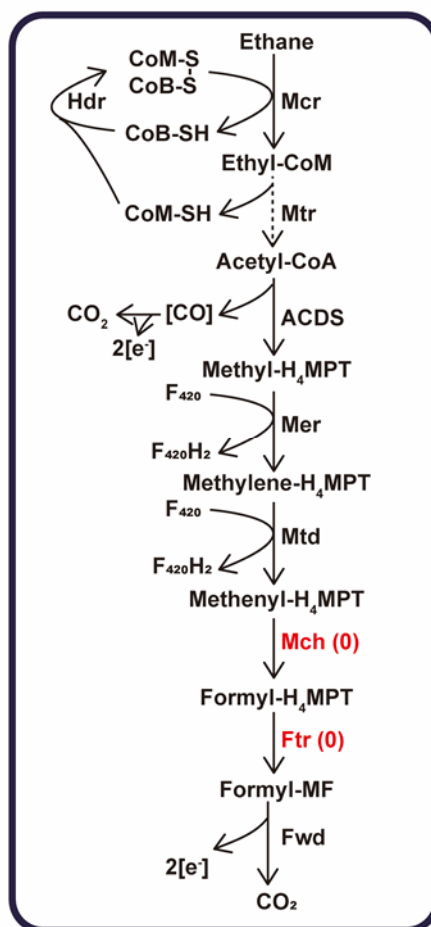

(c) Methanosarcinales Co\_bin109 (n=1, 92%)

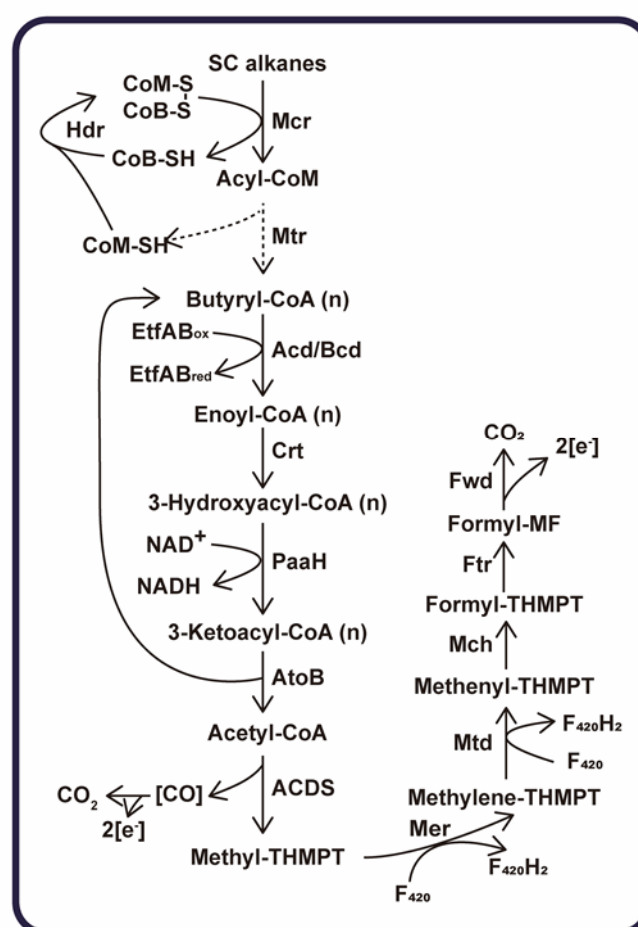

960 **Figure 5**

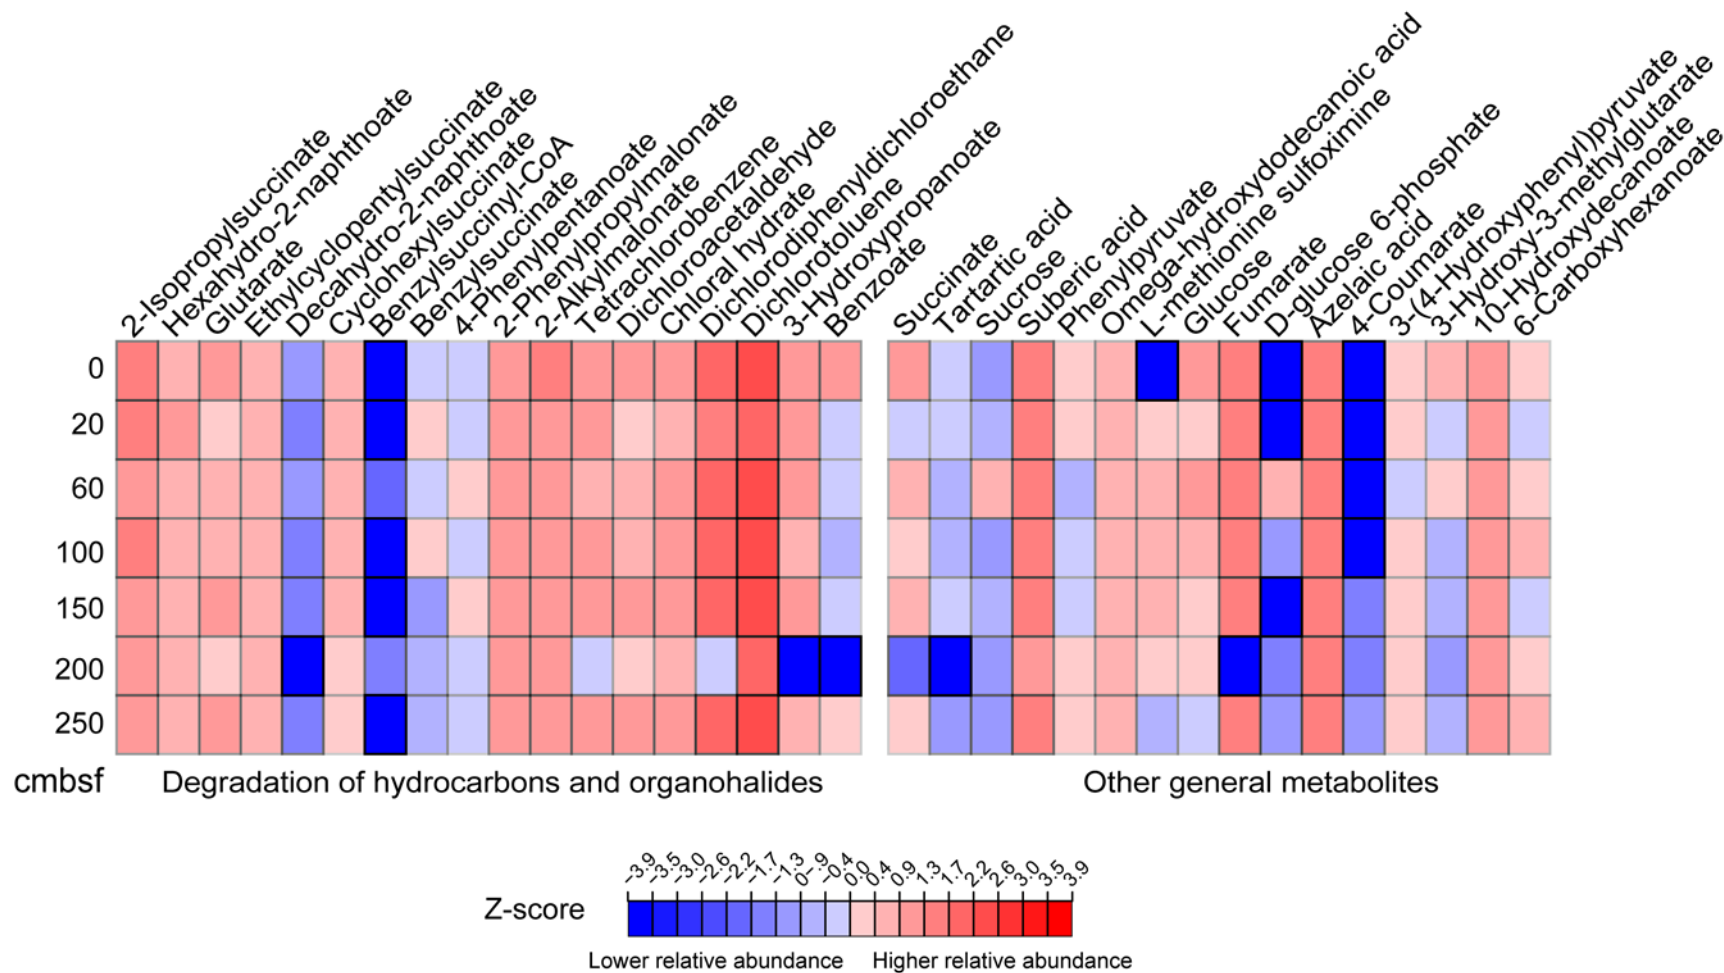

961

962 **Figure 6**

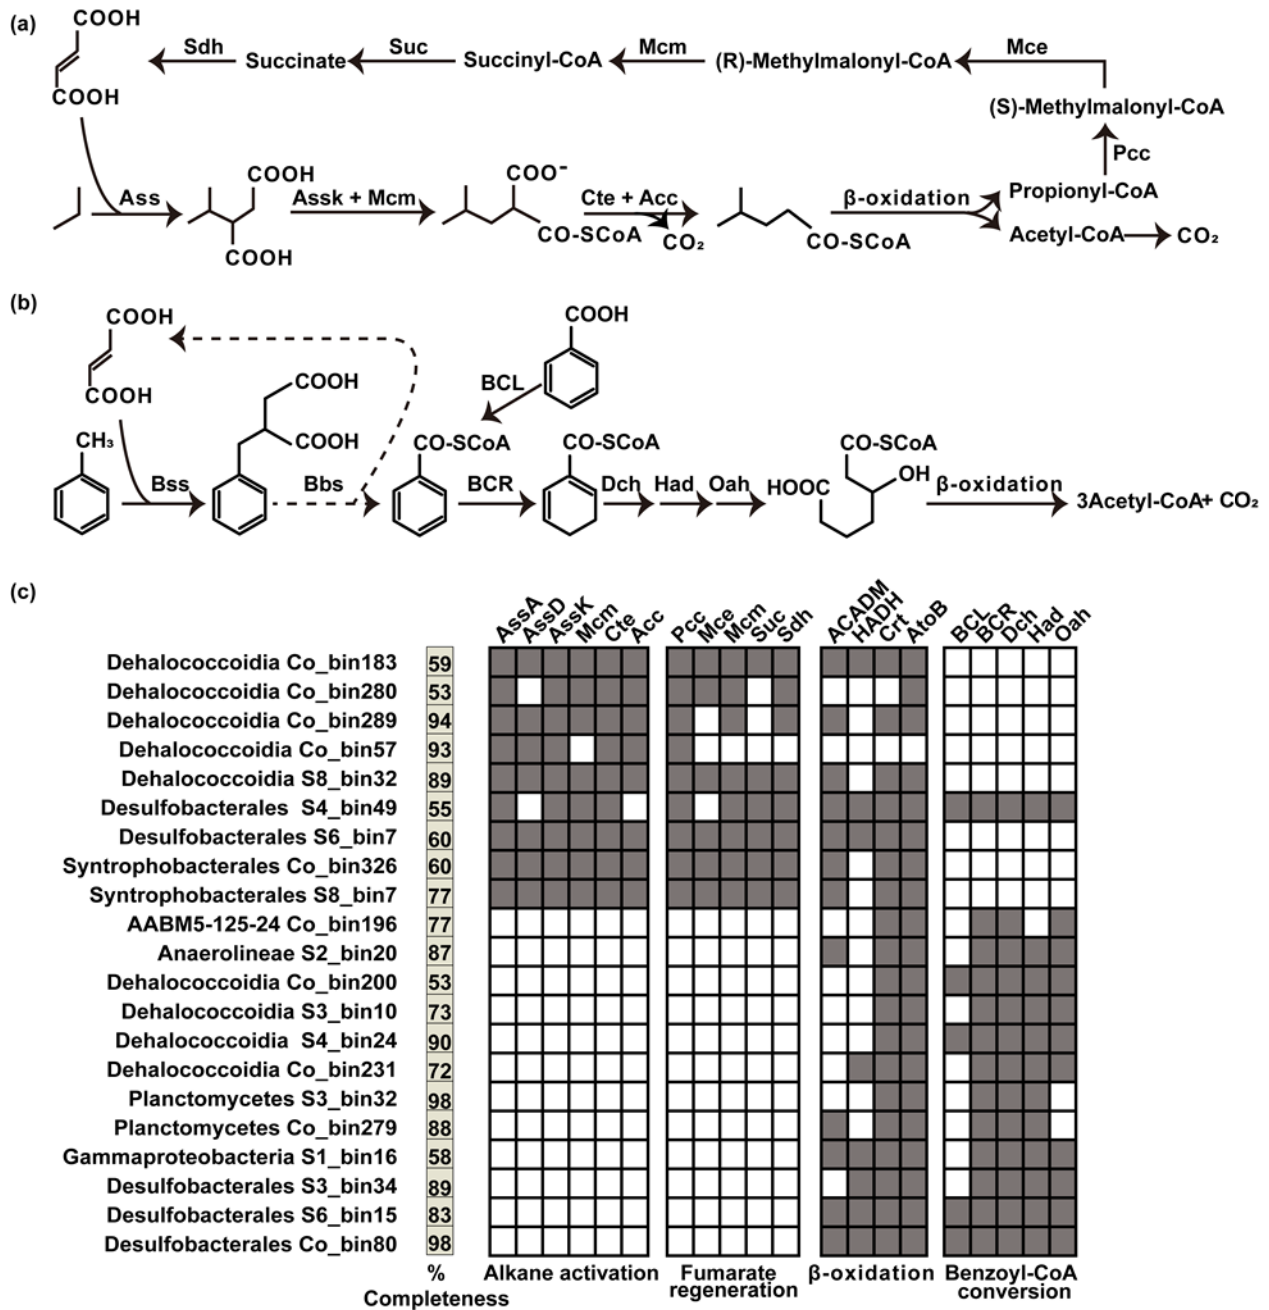

963
